# Supplementary material
Source: PubMed Central journal article supplement (PMC6375253)
Supplement: supp_7.1.E23_2018-0096-original-submission.pdf [file supp_7.1.E23_2018-0096-original-submission.pdf]

1  
2  
3  
4  
5 1 **CURRENT USE AND COSTS OF ELECTRONIC HEALTH RECORDS FOR**  
6  
7 2 **CLINICAL TRIAL RESEARCH: A DESCRIPTIVE STUDY**  
8  
9

10 3 Kimberly A. Mc Cord MSc<sup>1</sup>, Hannah Ewald PhD MPH<sup>1,2</sup>, Aviv Ladanie MSc<sup>1,3</sup>, Matthias Briel  
11 4 MD MSc <sup>1,4</sup>, Benjamin Speich PhD<sup>1</sup>, Heiner C. Bucher MD MPH<sup>1</sup>, Lars G. Hemkens MD  
12 5 MPH<sup>1</sup>, a collaboration of the RCD for RCT-initiative and the MARTA-Group  
13

14 6  
15 7 *<sup>1</sup>Basel Institute for Clinical Epidemiology and Biostatistics, Department of Clinical Research,*  
16 8 *University Hospital Basel, University of Basel, Switzerland*

17 9 *<sup>2</sup>University Medical Library, University of Basel, Basel, Switzerland*

18 10 *<sup>3</sup>Swiss Tropical and Public Health Institute, University of Basel, Switzerland*

19 11 *<sup>4</sup>Department of Health Research Methods, Evidence, and Impact, McMaster University,*  
20 12 *Hamilton, Canada*  
21  
22  
23  
24  
25  
26

27 16 **Correspondence:**

28 17 Lars G. Hemkens MD, MPH  
29 18 Basel Institute for Clinical Epidemiology & Biostatistics  
30 19 Department of Clinical Research  
31 20 University Hospital Basel  
32 21 Spitalstrasse 12  
33 22 CH-4031 Basel, Switzerland  
34 23 Phone: +41 61 265 3100  
35 24 Email: lars.hemkens@usb.ch  
36  
37  
38  
39  
40  
41  
42  
43

44 28 **Declaration of competing interests:** All authors have completed the Unified Competing Interest  
45 29 form at [www.icmje.org/coi\\_disclosure.pdf](http://www.icmje.org/coi_disclosure.pdf) and declare no financial relationships with any  
46 30 organization that might have an interest in the submitted work in the previous three years.  
47

48 31 KAM, MB, HCB and LGH support the RCD for RCT initiative, which aims to explore the use of  
49 32 routinely collected data for randomized clinical trials. KAM, MB, BS and LGH are members of the  
50 33 MARTA-Group, which aims to explore how to Make Randomized Trials more Affordable. They  
51 34 have no other relationships or activities that could appear to have influenced the submitted work.  
52 35 All other authors declare to have no relationships or activities that could appear to have  
53 36 influenced the submitted work  
54

55 37 **Funding:** This work was supported by Stiftung Institut für klinische Epidemiologie (for further  
56 38 information regarding funding and competing interests, please refer to the acknowledgment  
57 39 section).  
58

59 40 Word count abstract: 249  
60 41 Word count main text: 3901  
42 42 Number of tables: 3  
43 43 Number of figures: 1  
44 44 Number of references: 43

## 46 **ABSTRACT**

47 **Background:** Electronic Health Records (EHRs) may support randomized clinical trials  
48 (RCTs). We aimed to describe the current use and costs of EHRs in RCTs with a focus on  
49 recruitment and outcome assessment.

50 **Methods:** This descriptive study is based on a PubMed search for RCTs published since  
51 2000 that evaluated any medical intervention while utilizing EHRs. Cost information was  
52 obtained from RCT investigators using EHR infrastructures for recruitment or outcome  
53 measurement but not exploring EHR technology itself.

54 **Results:** We included 189 RCTs. Most were carried out in North America [153 of 189,  
55 (81%)] and published recently [median 2012; interquartile range (IQR) 2009 to 2014].  
56 Seventeen RCTs (9%) including a median of 732 patients [IQR 73 to 2513] explored  
57 interventions not related to EHRs, including quality improvements, screening programs,  
58 or collaborative care and disease management interventions. Here EHRs were used for  
59 recruitment [14 of 17;(82%)] or outcome measurement [15 of 17;(88%)]. Overall, the  
60 majority of studies measured the outcome using EHRs [158 of 189; (84%)], including  
61 many of the most patient-relevant clinical endpoints, from unscheduled hospitalizations  
62 to mortality. The per-patient costs varied from 44 to 2000 United States Dollars (USD),  
63 and total RCT costs from 67'750 to 5'026'000 USD. The other 172 of 189 RCTs evaluated  
64 EHR or EHR-modifications as modality of the intervention.

### 65 **Interpretation:**

66 RCTs are frequently and increasingly conducted using EHRs, but mainly as part of the  
67 intervention. Some RCTs successfully used EHRs to support recruitment and outcome  
68 assessment with possible cost savings once the data infrastructure is established.

## 70 **BACKGROUND**

71 Randomized clinical trials (RCTs) are the standard for evaluating benefits and harms of  
72 medical treatments. However, they are often time consuming and expensive to conduct  
73 and some trials rely on strictly standardized research settings that may limit the  
74 generalizability of their results(1). Electronic health records (EHR), or electronic  
75 databases containing patient level variables that are gathered during routine medical

1  
2  
3 76 care (Appendix 1, Box), provide great potential for implementing large scale and  
4  
5 77 pragmatic trials(2, 3). RCTs could be directly integrated in routine care offering almost  
6  
7 78 perfect generalizability of their results(4). Recently, the Patient-Centered Outcomes  
8  
9 79 Research Institute (PCORI) has awarded 332 million United States Dollars (USD) to 28  
10  
11 80 pragmatic clinical studies, many of them utilizing EHR infrastructures and many of them  
12  
13 81 integrated in routine care(5).

14  
15 82 Great debate of the potential barriers and limitations of EHR use in clinical research  
16  
17 83 persists, and further details on these obstacles have been discussed elsewhere(3, 6).  
18  
19 84 Briefly, the two largest direct advantages of using routinely collected data (RCD) for  
20  
21 85 clinical trials may be the facilitation of patient recruitment and of outcome assessment.  
22  
23 86 Randomization of treatment may occur directly from the EHR during the patient's visit,  
24  
25 87 maximizing recruitment rates(7). Recruiting patients through the EHR would allow to  
26  
27 88 pre-screen for eligibility before approaching the potential participant and thus allowing  
28  
29 89 to tailor the efforts towards the appropriate sample; furthermore, rapid consecutive  
30  
31 90 enrollment would favor recruitments through automatic screening and selection of  
32  
33 91 participants through the EHR database(8). This could substantially boost trials requiring  
34  
35 92 large sample sizes or slow recruiting trials. Yet, the ability to assess outcomes without  
36  
37 93 having to measure or collect them could be the most appealing resource-sparing  
38  
39 94 advantage of EHRs in RCTs. Even when funds are not at issue, just the decrease in  
40  
41 95 logistical difficulties themselves, particularly in large RCTs, could be worth extracting  
42  
43 96 routinely collected EHR data. Thus, EHR may have an important role in the potential of  
44  
45 97 implementing large scale and pragmatic trials(2, 3). This offers entirely new perspectives  
46  
47 98 on evaluating health care interventions that favor the development of learning healthcare  
48  
49 99 systems(7).

50  
51 100 Nonetheless, the cost associated with implementing the EHR/EMR infrastructure in the  
52  
53 101 first place may be substantial(9). While one could argue that using EHRs for research  
54  
55 102 purposes might lead to more affordable trials, there is no systematic overview of  
56  
57 103 empirical cost estimates per individual trial participant in EHR-supported RCTs.

58  
59 104 We conducted a systematic descriptive survey of the use of EHRs in RCTs to determine  
60  
105 how EHRs are implemented in clinical research settings and to describe specifically how  
106  
107 this technology is used to support recruitment and outcome assessment. We aimed to  
determine their frequency of use and describe possible applications of the EHR

1  
2  
3 108 technology in current practice, focusing on trials that were supported by the EHR rather  
4  
5 109 than evaluating the EHR itself.  
6  
7

## 8 110 **METHODS**

9

10 111 We performed a descriptive study assessing the current use of EHR technology in RCTs.  
11 112 We included any RCT in humans, addressing any health-related topic, published in  
12 113 English since January 2000, that utilized EHR for any purpose, including the recruitment  
13 114 of participants, intervention delivery, or outcome assessment(10). Focusing on modern  
14 115 technology we did not include older trials. There were no other eligibility criteria.

15  
16  
17  
18  
19 116 Definitions for EHR and related data vary(10-12). Our working definitions are shown in,  
20 117 Appendix 1, Box. Briefly, we considered EHRs an archive of health-related data in digital  
21 118 form, collected during routine clinical care for each individual patient, stored and  
22 119 exchanged securely, and accessible by multiple authorized users in a network of care  
23 120 providers(11). The EHR infrastructure used in eligible RCTs must have already existed  
24 121 and data just been obtained through a query of the EHR-database (i.e. no data specifically  
25 122 fabricated for the experiment would be considered routinely collected, for example when  
26 123 the trial was about the novel implementation of an EHR vs. no such implementation).  
27 124 There is no protocol published for this descriptive study.  
28  
29  
30  
31  
32  
33  
34  
35

### 36 125 **Literature search**

37

38 126 We queried PubMed (last search on 13 September 2017) for English articles, published  
39 127 since 1 January 2000 using keywords such as “electronic health record”, “electronic  
40 128 medical record”, “health information exchange“, “patient health record”, “e-health” using  
41 129 an established RCT filter(13) (Appendix 2). Our search integrated the search strategy for  
42 130 EHRs provided by the U.S. National Library of Medicine(14), and was developed with the  
43 131 support of an information specialist (HE). Two reviewers (KAM and HE or AL) screened  
44 132 titles and abstracts. We obtained any article deemed pertinent by at least one reviewer  
45 133 as full text. One reviewer (KAM) evaluated full texts and determined eligibility, another  
46 134 reviewer confirmed all exclusions (LGH).  
47  
48  
49  
50  
51  
52  
53  
54

### 55 135 **Data extraction**

56

57 136 Eligible RCTs were classified based on the way in which the EHRs were utilized: (a) for  
58 137 patient recruitment in any form, (b) outcome assessment in any form, (c) for the trial  
59  
60

1  
2  
3 138 intervention itself, or (d) other possible purposes. For patient recruitment, we considered  
4  
5 139 any effort of identifying trial participants based on certain characteristics, which was  
6  
7 140 done through an EHR query, as well as any randomization of consecutive patients done  
8  
9 141 through the EHR. For outcome assessment, we considered any trial in which any of the  
10  
11 142 outcomes was obtained by querying or manually checking the EHR document (thus,  
12  
13 143 where the endpoint was routinely found within the EHR).

14  
15 144 We then sub-classified included RCTs into, (1) EHR-supported trials, where the EHR was  
16  
17 145 used as research tool for conducting the trial (e.g. when patients with certain conditions  
18  
19 146 are identified as enhanced recruitment strategy or adverse event outcomes are queried  
20  
21 147 through a hospital) and into, (2) EHR-evaluating trials, in which using an EHR or an EHR-  
22  
23 148 modification was evaluated as part of the randomly allocated intervention (i.e. software  
24  
25 149 alteration or addition, e.g. a randomized implementation of a drug interaction alert  
26  
27 150 system in a hospital's EHR ordering system). Furthermore, we extracted the RCT's  
28  
29 151 research question, other study characteristics (sample size, country of origin, and unit of  
30  
31 152 randomization), and whether the trials included order entry systems (CPOE/CDS, see  
32  
33 153 Appendix 1, Box), telehealth or personal health records (PHRs).

34  
35 154 For EHR-supported trials, we additionally determined the trial settings and more specific  
36  
37 155 EHR utilizations (type of EHR and application in the trial, such as the type of alerts it  
38  
39 156 would display in decision support systems). Furthermore, we extracted whether an  
40  
41 157 advanced algorithm for patient identification/recruitment, or other purpose was  
42  
43 158 developed. We also recorded if the recruitment was done prospectively (e.g. by  
44  
45 159 advertisement and invitation, not through EHR), concurrently (i.e. in the point-of-care  
46  
47 160 setting, through EHR), or retrospectively (i.e. screening a patient list, may be through EHR  
48  
49 161 or not); and whether RCD were the only outcome source or if a hybrid approach was  
50  
51 162 utilized. A hybrid approach could be that (1) some outcomes were based on RCD alone  
52  
53 163 and other outcomes were entirely actively collected or (2) some outcomes were  
54  
55 164 measured based on RCD and this measurement was supplemented by active data  
56  
57 165 collection (e.g. when reported by patients outside an EHR network), or if a relevant  
58  
59 166 amount (more than 10% of the total RCD source) was manually checked for validation.  
60  
167 We specifically recorded the primary outcome of the trial and if it was measured using  
168 routinely collected EHR data alone, when it was measured (duration of follow-up), and  
169 any information on missing data or loss to follow-up. Furthermore, we extracted, for each

1  
2  
3 170 trial, whether blinding and allocation concealment measures were performed. We  
4  
5 171 searched the full-texts for keywords, such as “placebo”, “blind”, “label” and “mask” to  
6  
7 172 identify such statements, and then proceeded with extracting the statement when  
8  
9 173 reported. One reviewer (KM) extracted all data. We aimed to provide a general overview  
10  
11 174 on potential issues of bias in the EHR-supported studies. One reviewer (KAM and BS)  
12  
13 175 used the Cochrane risk of bias tool, a second reviewer verified the assessments (KAM, HE,  
14  
15 176 BS or LGH). Any disagreement was resolved by discussion.

## 16 177 **Trial costs**

17  
18 178 We contacted the authors of included EHR-supported trials, requested cost information  
19  
20 179 through a standardized email and extracted any cost information reported in the  
21  
22 180 publications. We aimed to obtain a cost estimate which would allow comparison with  
23  
24 181 traditional trials. Therefore, we were not interested in costs of EHR-evaluating trials.

25  
26 182 We explained to the authors that the costs of the trial could have been divided in three  
27  
28 183 major ways(15): (1) Cost of the project/trial development and preparation (e.g. for  
29  
30 184 insurance, travelling, infrastructure, consulting, sample size calculation, database set up,  
31  
32 185 etc.), (2) Cost of enrollment, treatment and follow up (e.g. per-patient costs, salary costs,  
33  
34 186 patient reimbursement costs, materials and/or drugs costs; etc.) and (3) Cost after last  
35  
36 187 patient out (data cleaning costs, analysis costs, publications costs; etc.).

37  
38 188 We aimed for only a raw cost estimate and accepted any information we could. We  
39  
40 189 converted cost values to USD where applicable, based on the exchange rate on 1  
41  
42 190 November 2017(16). We sent the data presented here to all trial authors for  
43  
44 191 confirmation.

## 45 192 **Statistical analysis**

46  
47 193 Results are reported descriptively using proportions and medians with interquartile  
48  
49 194 ranges if not otherwise stated. Since our study was exploratory, we did not use any  
50  
51 195 statistical tests.



## 197 **RESULTS**

198 After screening 1680 titles and abstracts, 394 potentially relevant articles were obtained  
199 as full texts and 189 EHR-RCTs were eligible (Figure 1).

### 200 **All RCTs**

201 Of the 189 RCTs, 17 were supported by an EHR (EHR-supported trials; 9%) while the  
202 majority [172; (91%)] utilized EHRs as modality of intervention (EHR-evaluating).

203 The vast majority of both EHR-supported and EHR-evaluating trials originated from  
204 North America [13 of 17; (76%) and 140 of 172; (81%), respectively] and were published  
205 recently [median 2012; (IQR 2009 to 2014)]. EHR-supported trials were cluster-  
206 randomized in 3 of 17 of trials (18%), while the EHR-evaluating trials were cluster  
207 randomized in 61 of 172 of trials (35%). There were no placebo controlled trials in our  
208 sample, and the majority of trials did not report the level of blinding [101 of 189; (53%)];  
209 blinded outcome assessment was the most frequent type of blinding reported (19%),  
210 followed by open label (14%), single-blinding (10%) and double-blinding (4 %)(Table 1).

### 211 **RCTs supported by EHRs**

212 The interventions and settings varied among the 17 EHR-supported trials(17-33) (Table  
213 ). Five trials (29%) utilized the EHR of a U.S. Veteran's Affairs or affiliated facility. Most  
214 trials evaluated quality improvement interventions which often involved clinician  
215 education and feedback initiatives [8 of 17; (47%)], screening programs [4 of 17; (24%)],  
216 and collaborative care and disease management interventions integrated in primary care  
217 settings [3 of 17; (18%)]. Almost half of the studies took place in primary care clinics [8  
218 of 17; (47%)], in healthcare networks [5 of 17; (29%)] and in hospitals [3 of 17 (18%)].  
219 One trial was performed entirely within a pharmacy EMR (6%).

#### 220 *Supported outcome measurement*

221 Of the 17 EHR-supported trials, 15 measured outcomes using the EHR (88%) (Table 1).  
222 The EHR-assessed outcomes were typically screening uptake (e.g. women seeking a Pap-  
223 test after receiving an automated call from the EHR prompting cervical cancer screening)  
224 [6 of 15; (40%)], clinical outcomes [4 of 15; (27%)], drug adherence [2 of 15; (13%)], or  
225 guideline concordant care measures [2 of 15; (13%)]. In 7 out of 15 trials (47%), the RCD  
226 source was the only source of outcome data in the entire trial, while in the remaining 8

1  
2  
3 227 (53%) a hybrid approach was applied with some outcome data being actively collected.  
4  
5 228 In 4 of these 8 cases(18, 19, 27, 30), the primary outcome was fully extracted from an  
6  
7 229 EHR but additional outcomes were actively collected while in 3 cases(20, 21, 32), the  
8  
9 230 primary outcome was actively collected but additional outcomes were EHR-based. In one  
10  
11 231 case, the primary outcome was collected through the EHR but verified with actively  
12  
13 232 collected data(22). Overall, 12 of 15 of the trials (80%) relied on EHR for the primary  
14  
15 233 outcome assessment. The trial duration was on median 10 months (IQR 5 to 12); 10 of 17  
16  
17 234 trials (59%) reported the number of missing data or patients lost to follow-up, but none  
18  
19 235 reported on the quality of the data.

#### 20 236 *Supported recruitment*

21  
22 237 Of the 17 EHR-supported trials, 14 (82%) used the EHR as tool for patient recruitment  
23  
24 238 (Table 1). One(29) of them reported a prospective approach, while the remaining 13 used  
25  
26 239 the EHR retrospectively (i.e. they reported merely using a manual check or simple  
27  
28 240 retrospective query of eligible patients via EHR); additionally, only one(17) reported  
29  
30 241 using a complex querying system (another one(26) appeared to but did not report it  
31  
32 242 specifically). The other 3 of the 17 trials used a (traditional) prospective recruitment  
33  
34 243 approach without EHR (18%).

#### 35 244 *Costs*

36  
37 245 We contacted 13 of the 17 corresponding authors from the EHR-supported trials. Emails  
38  
39 246 were undeliverable to 3 addresses, for which we were also unable to find an alternative  
40  
41 247 contact online and we were never able to reach the authors. We obtained information of  
42  
43 248 trial costs for 4 (17, 23, 26, 29) of the 17 trials and, additionally, intervention cost data  
44  
45 249 from one trial(33) (24% response rate).

46  
47 250 Cost information came from one Australian (17) and 4 U.S. trials(23, 26, 29, 33) (2 within  
48  
49 251 the Veterans Affairs network(26, 33)). The costs varied from 67'750 USD to 5'026'000  
50  
51 252 USD for total trial costs (median 86'753 USD) and from 44 USD to 2000 USD for per-  
52  
53 253 patient costs (median 315 USD) (Table 3). Overall trial costs were derived from funding  
54  
55 254 budgets in three cases while one author stated that the overall costs were 2000 USD per  
56  
57 255 patient. In the trial(17) which leveraged the EHR database through automated data  
58  
59 256 extraction, the per-patient costs was 44 USD. In the 2 cases(23, 29) where the extraction  
60  
257 of study data from the EHR source was still done manually, the per-patient costs varied



1  
2  
3 258 from 560 to 2000 USD. We have no information in this regard for one trial(26). The trial  
4  
5 259 which presented only the costs of the intervention (extracting data from EHR to give a  
6  
7 260 feedback to health-care providers) reported costs of 44 USD per patient when the data  
8  
9 261 was extracted manually and a sensitivity analysis indicated that these costs could  
10  
11 262 decrease to only 9 USD if the data were extracted automatically(33).

### 12 263 *Risk of Bias*

14  
15 264 Three trials had no indication for high risk of bias in any of the assessed domains  
16  
17 265 (Appendix 4). There were no indications for high risk of bias related to randomization or  
18  
19 266 allocation concealment in any of the trials. Most trials were open-label or assessed an  
20  
21 267 intervention that was not disguisable from the participants/providers, which may  
22  
23 268 indicate a high risk of bias. Relevant to EHRs-trials, risk for attrition bias was generally  
24  
25 269 low (missing outcome data for not more than 10% of patients), and in four trials, all data  
26  
27 270 was reported for all patients.

28 271

### 30 272 **RCTs using EHR for intervention**

32  
33 273 Of the 172 EHR-evaluating trials (references in Appendix ), 143 measured outcomes  
34  
35 274 using the EHR (83%), and 91 (53%) used the EHR as tool for patient recruitment (Table  
36  
37 275 1). Computerized decision support systems such as CPOE or CDS (definitions in Appendix  
38  
39 276 1, Box) were evaluated in 75% (128 of 172) of the trials. Personal health records were  
40  
41 277 evaluated in 15% (26 of 172) of the trials. Telemonitoring tethered vital sign measuring  
42  
43 278 devices connected to the EHR were evaluated in 8% (14 of 172) of the trials and very few  
44  
45 279 [4 of 172; (2%)] evaluated electronic patient reported outcomes (Table 1).

## 280 INTERPRETATION

281 The majority of trials using EHR explored the EHR technology itself. However, we  
282 identified 17 trials that investigated an EHR-unrelated intervention and were supported  
283 by using EHR for patient recruitment or for outcome assessment. Most of them were  
284 published recently, indicating a rapid development in this field.

285 There is, to our knowledge, no similar study describing the current use of EHR in clinical  
286 trials. However, the potential of registry-based trials for comparative effectiveness  
287 research and the current state of using registries for RCTs, in particular for outcome  
288 ascertainment, has been reviewed recently(8, 34). Interestingly, while the settings and  
289 implementation were similar to those identified in our sample, registry trials are most  
290 frequently performed in Scandinavian countries(34), and EHR trials predominantly in  
291 North America. Registry trials also often collect their primary outcome data using routine  
292 data (82%), similarly to EHR trials (80%), indicating confidence in the reliability of this  
293 data(34). Information about data quality and validity was rarely reported for registry-  
294 based trials (11%)(34) as well as in our sample of EHR-supported RCTs (where it was  
295 not reported by any of the trials), indicating similar reporting problems as in  
296 observational RCD research(35). This may be expected given the current lack of a  
297 standardized reporting guideline for RCD-RCTs but also highlights a substantial  
298 transparency problem.

299 The overwhelming majority of trials in our sample were measuring an outcome with  
300 EHRs [158 of 189; 84%], including many of the most patient-relevant clinical endpoints,  
301 from unscheduled hospitalizations to mortality. But there were also less pragmatic and  
302 more exploratory, mechanistic(36, 37) outcomes which help to understand  
303 pathophysiological processes (for example one study even utilized EHR-extracted lipid  
304 levels during a lipid-lowering agent trial(38)). We also identified the, to our knowledge,  
305 first trial that used routinely collected data in a pre-licensing setting in the context of drug  
306 approval (the Salford lung study(32)).

307 The identified EHR-supported trials were quite heterogeneous concerning their targeted  
308 populations and outcomes measured, with a few exceptions. For example, over a third of  
309 this subsample was comprised of Veteran's Affairs trials, all of which utilized EHR for  
310 outcome and patient identification. This is likely due to the fact the VA has had a long

1  
2  
3 311 established EHR system, and its widespread network allows for ease in designing and  
4  
5 312 implementing these types of trials.  
6

7 313 Another interesting finding that relates to the EHR-evaluating trials in our sample is the  
8  
9 314 high proportion, approximately one third, of trials using cluster-randomization. This  
10  
11 315 indicates that EHR-based trials mostly evaluate interventions not on at the patient-level  
12  
13 316 but more at a system-level, as when aiming to redirect physician behavior, etc. This  
14  
15 317 introduces the risk of contamination between the randomized units (e.g. physicians) and  
16  
17 318 thus requires a cluster design to be implemented.  
18

19 319 Other than by its affordability, the great theoretical value of integrating EHR in clinical  
20  
21 320 trials lies in its potential for patient recruitment. For example, D'Avolio et al  
22  
23 321 ("Implementation of the Department of Veterans Affairs' first point-of-care clinical trial.")  
24  
25 322 reports on a VA pilot study(39) that in addition to those identified in our sample shows  
26  
27 323 how convenient it can be to identify patients based on specific characteristics (the EHR  
28  
29 324 database is "scanned" and a list of possibly eligible patients results), and even to recruit  
30  
31 325 them, by sending an automatic electronic message to their clinician. Even with a smaller  
32  
33 326 response rate, when the contacted patients are in the order of thousands, this could lead  
34  
35 327 to greater recruitment capacity; which could be of substantial value particularly in those  
36  
37 328 RCTs where difficult recruitment is already suspected during planning. We identified that  
38  
39 329 almost half of the EHR-supported trials that used EHR for recruitment made use of more  
40  
41 330 sophisticated techniques such as the proposed mechanisms of data-mining. While there  
42  
43 331 are trials that recruited patients by screening the EHR without specifying the use of a  
44  
45 332 particular algorithm addition, most EHRs will require some programming to identify  
46  
47 333 specific traits in the system that go beyond the basic EHR abilities (i.e., typing a diabetes  
48  
49 334 ICD-10-CM code in a search window and obtain a list of patients, which can be done  
50  
51 335 manually). More advanced EHR add-ons, which can screen for multiple variables at  
52  
53 336 multiple levels contemporary and continuously (i.e. screening the system every two  
54  
55 337 hours or instantly during care for the whole time of the trial) do require planning and  
56  
57 338 validation. An example of such EHR screening tool is one developed and used in the  
58  
59 339 Bereznicki 2008 trial, where this "data-mining tool" scrutinized the pharmacy EMR based  
60  
340 on a specified protocol (history of asthma medication being dispensed more frequently  
341 than guideline customs, such as patient refilling its rescue inhaler more often than  
342 expected) which flagged patients with poorly controlled asthma. These patients were

1  
2  
3 343 then contacted, received educational material for self-management, and were prompted  
4  
5 344 to contact their care providers. This example shows how using an EHR for patient  
6  
7 345 identification and recruitment can be efficiently done yet that it requires significant  
8  
9 346 planning and software development. We provide a general framework with the various  
10  
11 347 potential applications and challenges of using RCD in different trial conduct phases  
12  
13 348 elsewhere(3, 6).

14 349 The author-reported costs could support the assumption that using RCD for RCT may  
15  
16 350 promote cost reduction as long as the outcome data source is already established and not  
17  
18 351 a financial responsibility of the research endeavor. In the three trials(17, 26, 33) in which  
19  
20 352 the EHR infrastructure was well established and merely redirected for use in these trials,  
21  
22 353 the costs per patient (median 44 USD) were much lower than often reported costs in  
23  
24 354 traditional trials(40). The costs of the two trials(23, 29) in which the infrastructure was  
25  
26 355 less integrated (such as actively screening the EHR for assessing the clinical endpoint),  
27  
28 356 remained more similar to those of traditional RCTs (median 1280 USD per patient). The  
29  
30 357 recently published overview of registry trials by Li et al. (8) found similar trial cost  
31  
32 358 patterns (i.e. a reduction of costs when the outcome data did not require manual  
33  
34 359 collection but leveraged the registry infrastructure instead).

## 35 **Limitations**

36 361 Some limitations of our study merit closer attention. Firstly, we did not aim for a complete  
37  
38 362 sample of all published EHR-based trials and we searched PubMed only, but we aimed for  
39  
40 363 a systematic, comprehensible and reproducible survey of the current literature. We used  
41  
42 364 a highly sensitive search algorithm and implemented specific EHR search filters provided  
43  
44 365 by the U.S. National Library of Medicine. Nonetheless, we assume that we overlooked  
45  
46 366 several pertinent publications that did not indicate in their keywords, title or abstract the  
47  
48 367 application of EHRs. This may have engendered an overrepresentation of EHRs used for  
49  
50 368 interventions in our sample and especially the observed disproportion of EHR-evaluating  
51  
52 369 and EHR-supported trials needs to be interpreted with caution.

53 370 Secondly, searching for English articles indexed in PubMed alone may have created  
54  
55 371 regional bias, with a potential overrepresentation of Anglo-American studies. This could  
56  
57 372 explain the high proportion of studies from the USA. Nonetheless, substantial legislative  
58  
59 373 and financial efforts have been placed in North America, encouraging the acquisition and  
60

1  
2  
3 374 employment of EHR technology, which may be more likely the reason for this critical  
4  
5 375 imbalance.

6  
7 376 Thirdly, the trials were highly diverse showing the various fields of EHR application, but  
8  
9 377 we would need more data to further evaluate individual details and explore, for example,  
10  
11 378 the ethical constraints associated with no-consent point-of-care trials(41, 42).

12  
13 379 Fourthly, only one reviewer (KAM) assessed the full-text eligibility and completed several  
14  
15 380 parts of the data extraction, which could have introduced some error in the selection of  
16  
17 381 the trials. Nonetheless, we feel that the identified trials still provide an overview of the  
18  
19 382 mode of utilization of EHR trials.

20  
21 383 Fifthly, we did not test any hypothesis regarding the effect of using EHR in trials, nor did  
22  
23 384 we assess the impact of using EHR on endpoint ascertainment. While we extracted a few  
24  
25 385 characteristics that can point to the methodological quality of the studies, including an  
26  
27 386 evaluation of major domains of risk of bias, we did not evaluate the treatment effects  
28  
29 387 reported in the EHR trials, but merely offered a description of their use.

30  
31 388 Finally, we obtained only a few rough cost estimates without details, not allowing us to  
32  
33 389 deduce any cost patterns; however, it provides first estimates to shed some light in this  
34  
35 390 area.

## 36 391 **Conclusions**

37  
38 392 We conclude that EHRs are a novel and valuable addition to clinical research. There are  
39  
40 393 numerous examples of how EHR successfully implemented in clinical research settings  
41  
42 394 supported recruitment and outcome measurement in randomized trials. They may be  
43  
44 395 associated with lower research costs, overall allowing the conduct of more or larger RCTs.  
45  
46 396 Altogether, these are very promising developments towards more randomized real-  
47  
48 397 world evidence.

49  
50  
51  
52  
53  
54  
55  
56  
57  
58  
59  
60

1  
2  
3 398 **ACKNOWLEDGMENTS**

4  
5 399 **Data sharing**

6  
7  
8 400 No additional data available.

9  
10 401 **Declaration of competing interests**

11  
12 402 All authors have completed the Unified Competing Interest form at  
13 403 [www.icmje.org/coi\\_disclosure.pdf](http://www.icmje.org/coi_disclosure.pdf) and declare no financial relationships with any  
14 404 organization that might have an interest in the submitted work in the previous three  
15 405 years.

16 406 KAM, MB, HCB and LGH support the RCD for RCT initiative, which aims to explore the use  
17 407 of routinely collected data for clinical trials. KAM, MB, BS and LGH are members of the  
18 408 MARTA-Group, which aims to explore how to Make Randomized Trials more Affordable.

19  
20 409 They have no other relationships or activities that could appear to have influenced the  
21 410 submitted work. All other authors declare to have no relationships or activities that could  
22 411 appear to have influenced the submitted work

23  
24 412 **Contributors**

25  
26 413 LGH conceived the study. KAM, HE and AL screened titles, abstracts and full-text  
27 414 publications. KAM extracted the data. KAM and LGH analysed the data. All authors  
28 415 interpreted the results. KAM and LGH wrote the first draft and all authors made revisions  
29 416 on the manuscript. All authors read and approved the final version of the paper. KAM and  
30 417 LGH are the guarantors.

31  
32 418 **Funding**

33  
34 419 This work was supported by Stiftung Institut für klinische Epidemiologie. Benjamin  
35 420 Speich was supported by the Research Foundation of the University of Basel.

36  
37 421 **Role of the funding source**

38  
39 422 The funders had no role in design and conduct of the study; collection, management,  
40 423 analysis, and interpretation of the data; and preparation, review, or approval of the  
41 424 manuscript or its submission for publication.

42  
43 425 **Copyright**



1  
2  
3 426 The Corresponding Author has the right to grant on behalf of all authors and does grant  
4  
5  
6 427 on behalf of all authors.  
7

8  
9 428 **Transparency declaration**

10  
11 429 The Corresponding Author affirms that the manuscript is an honest, accurate, and  
12  
13 430 transparent account of the study being reported; that no important aspects of the study  
14  
15 431 have been omitted; and that any discrepancies from the study as planned have been  
16  
17 432 explained.  
18

19 433 **Ethical approval**

20  
21 434 Not required, this article does not contain any personal medical information about any  
22  
23 435 identifiable living individuals.  
24

25  
26 436  
27  
28  
29  
30  
31  
32  
33  
34  
35  
36  
37  
38  
39  
40  
41  
42  
43  
44  
45  
46  
47  
48  
49  
50  
51  
52  
53  
54  
55  
56  
57  
58  
59  
60

Confidential

437 **REFERENCES**

- 438 1. Bothwell LE, Greene JA, Podolsky SH, Jones DS. Assessing the Gold  
439 Standard — Lessons from the History of RCTs. *New England Journal of*  
440 *Medicine*. 2016;374(22):2175-81.
- 441 2. Zuidgeest MGP, Goetz I, Groenwold RHH, Irving E, van Thiel G, Grobbee  
442 DE. Series: Pragmatic trials and real world evidence: Paper 1. Introduction. *J*  
443 *Clin Epidemiol*. 2017;88:7-13.
- 444 3. Mc Cord KA, Al-Shahi Salman R, Treweek S, Gardner H, Strech D,  
445 Whiteley W, et al. Routinely collected data for randomized trials: Promises,  
446 barriers, and implications. *Trials*. 2018.
- 447 4. Ramsberg J, Neovius M. Register or electronic health records enriched  
448 randomized pragmatic trials: The future of clinical effectiveness and cost-  
449 effectiveness trials? 2015. 2015.
- 450 5. PCORI. Funded Pragmatic Clinical Studies Projects 2017 10.10.2017.  
451 Available from: [https://www.pcori.org/research-results/pragmatic-](https://www.pcori.org/research-results/pragmatic-clinical-studies/pcori-funded-pragmatic-clinical-studies-projects)  
452 [clinical-studies/pcori-funded-pragmatic-clinical-studies-projects](https://www.pcori.org/research-results/pragmatic-clinical-studies/pcori-funded-pragmatic-clinical-studies-projects).
- 453 6. Kimberly A. Mc Cord LGH. Using Electronic Health Records for Clinical  
454 Trials: Where do we stand and where can we go? *CMAJ* (Under Review).  
455 2018.
- 456 7. Friedman CP, Wong AK, Blumenthal D. Achieving a Nationwide  
457 Learning Health System. *Science Translational Medicine*.  
458 2010;2(57):57cm29-57cm29.
- 459 8. Li G, Sajobi TT, Menon BK, Korngut L, Lowerison M, James M, et al.  
460 Registry-based randomized controlled trials- what are the advantages,  
461 challenges, and areas for future research? *Journal of Clinical Epidemiology*.  
462 2016;80(Supplement C):16-24.
- 463 9. Menachemi N, Collum TH. Benefits and drawbacks of electronic health  
464 record systems. *Risk Manag Healthc Policy*. 2011;4:47-55.
- 465 10. Health Information Technology. What Is an Electronic Health Record  
466 (EHR)? 2013 [02.01.2016]. FAQs | Providers & Professionals ]. Available  
467 from: [https://www.healthit.gov/providers-professionals/faqs/what-](https://www.healthit.gov/providers-professionals/faqs/what-electronic-health-record-ehr)  
468 [electronic-health-record-ehr](https://www.healthit.gov/providers-professionals/faqs/what-electronic-health-record-ehr).
- 469 11. ISO - International Organization for Standardization. Health  
470 Informatics — Electronic Health Record — Definition, Scope and Context.  
471 2005.

- 1  
2  
3 472 12. Centers for Medicare & Medicaid Services. Electronic Health Records;  
4 473 (02.07.2016). Available from: [https://www.cms.gov/Medicare/E-  
5 474 Health/EHealthRecords/index.html?redirect=/EhealthRecords/](https://www.cms.gov/Medicare/E-Health/EHealthRecords/index.html?redirect=/EhealthRecords/).  
6  
7  
8 475 13. Higgins J, Green S. Cochrane Highly Sensitive Search Strategy for  
9 identifying randomized trials in MEDLINE: sensitivity- and precision-  
10 476 maximizing version (2008 revision); PubMed format. 2011 Updated March  
11 477 2011. In: Cochrane Handbook for Systematic Reviews of Interventions  
12 478 Version 510 [Internet]. [11].  
13 479  
14  
15 480 14. U.S. National Library of Medicine. Electronic Health Records MeSH  
16 481 Descriptor Data 2016 2016. Available from: <https://www.nlm.nih.gov/>.  
17  
18 482 15. Speich B, von Niederhausern B, Blum CA, Keiser J, Schur N, Furst T, et  
19 483 al. Retrospective assessment of resource use and costs in two investigator-  
20 484 initiated randomized trials exemplified a comprehensive cost item list. J Clin  
21 485 Epidemiol. 2018;96:73-83.  
22  
23  
24 486 16. Realtimekurse | Aktien | Börsenkurse | Börse [Internet]. Available  
25 487 from: <http://www.finanzen.ch/>.  
26  
27  
28 488 17. Bereznicki BJ, Peterson GM, Jackson SL, Walters EH, Fitzmaurice KD,  
29 489 Gee PR. Data-mining of medication records to improve asthma management.  
30 490 Med J Aust. 2008;189(1):21-5.  
31  
32 491 18. Corson K, Doak MN, Denneson L, Crutchfield M, Soleck G, Dickinson KC,  
33 492 et al. Primary care clinician adherence to guidelines for the management of  
34 493 chronic musculoskeletal pain: results from the study of the effectiveness of  
35 494 a collaborative approach to pain. Pain Med. 2011;12(10):1490-501.  
36  
37  
38 495 19. de Jong J, Visser MR, Wieringa-de Waard M. Steering the patient mix of  
39 496 GP trainees: results of a randomized controlled intervention. Med Teach.  
40 497 2013;35(2):101-8.  
41  
42  
43 498 20. Fu SS, van Ryn M, Sherman SE, Burgess DJ, Noorbaloochi S, Clothier B,  
44 499 et al. Proactive tobacco treatment and population-level cessation: a  
45 500 pragmatic randomized clinical trial. JAMA Intern Med. 2014;174(5):671-7.  
46  
47  
48 501 21. Galbreath AD, Krasuski RA, Smith B, Stajduhar KC, Kwan MD, Ellis R, et  
49 502 al. Long-term healthcare and cost outcomes of disease management in a  
50 503 large, randomized, community-based population with heart failure.  
51 504 Circulation. 2004;110(23):3518-26.  
52  
53  
54 505 22. Gerber JS, Prasad PA, Fiks AG, Localio AR, Grundmeier RW, Bell LM, et  
55 506 al. Effect of an outpatient antimicrobial stewardship intervention on broad-  
56 507 spectrum antibiotic prescribing by primary care pediatricians: a randomized  
57 508 trial. JAMA. 2013;309(22):2345-52.  
58  
59  
60

- 1  
2  
3  
4 509 23. Green BB, Wang CY, Anderson ML, Chubak J, Meenan RT, Vernon SW,  
5 510 et al. An automated intervention with stepped increases in support to  
6 511 increase uptake of colorectal cancer screening: a randomized trial. *Ann*  
7 512 *Intern Med.* 2013;158(5 Pt 1):301-11.
- 9 513 24. Hoffman RM, Steel S, Yee EF, Massie L, Schrader RM, Murata GH.  
10 514 Colorectal cancer screening adherence is higher with fecal immunochemical  
11 515 tests than guaiac-based fecal occult blood tests: a randomized, controlled  
12 516 trial. *Prev Med.* 2010;50(5-6):297-9.
- 15 517 25. Israel EN, Farley TM, Farris KB, Carter BL. Underutilization of  
16 518 cardiovascular medications: effect of a continuity-of-care program. *Am J*  
17 519 *Health Syst Pharm.* 2013;70(18):1592-600.
- 20 520 26. McCarren M, Furmaga E, Jackevicius CA, Sahay A, Coppler TL,  
21 521 Katzianer J, et al. Improvement of guideline beta-blocker prescribing in heart  
22 522 failure: a cluster-randomized pragmatic trial of a pharmacy intervention. *J*  
23 523 *Card Fail.* 2013;19(8):525-32.
- 26 524 27. Stewart JC, Perkins AJ, Callahan CM. Effect of collaborative care for  
27 525 depression on risk of cardiovascular events: data from the IMPACT  
28 526 randomized controlled trial. *Psychosom Med.* 2014;76(1):29-37.
- 30 527 28. Phillips CE, Rothstein JD, Beaver K, Sherman BJ, Freund KM, Battaglia  
31 528 TA. Patient navigation to increase mammography screening among inner  
32 529 city women. *J Gen Intern Med.* 2011;26(2):123-9.
- 35 530 29. Piazza G, Anderson FA, Ortel TL, Cox MJ, Rosenberg DJ, Rahimian S, et  
36 531 al. Randomized trial of physician alerts for thromboprophylaxis after  
37 532 discharge. *Am J Med.* 2013;126(5):435-42.
- 39 533 30. Qureshi N, Armstrong S, Dhiman P, Saukko P, Middlemass J, Evans PH,  
40 534 et al. Effect of adding systematic family history enquiry to cardiovascular  
41 535 disease risk assessment in primary care: a matched-pair, cluster randomized  
42 536 trial. *Ann Intern Med.* 2012;156(4):253-62.
- 45 537 31. Skinner CS, Halm EA, Bishop WP, Ahn C, Gupta S, Farrell D, et al. Impact  
46 538 of Risk Assessment and Tailored versus Nontailored Risk Information on  
47 539 Colorectal Cancer Testing in Primary Care: A Randomized Controlled Trial.  
48 540 *Cancer Epidemiol Biomarkers Prev.* 2015;24(10):1523-30.
- 51 541 32. Vestbo J, Leather D, Diar Bakerly N, New J, Gibson JM, McCorkindale S,  
52 542 et al. Effectiveness of Fluticasone Furoate-Vilanterol for COPD in Clinical  
53 543 Practice. *N Engl J Med.* 2016;375(13):1253-60.
- 56 544 33. Wolf MS, Fitzner KA, Powell EF, McCaffrey KR, Pickard AS, McKoy JM,  
57 545 et al. Costs and cost effectiveness of a health care provider-directed

- 1  
2  
3 546 intervention to promote colorectal cancer screening among Veterans. *J Clin*  
4 547 *Oncol.* 2005;23(34):8877-83.
- 6 548 34. Mathes T, Buehn S, Prengel P, Pieper D. Registry-based randomized  
7 549 controlled trials merged the strength of randomized controlled trails and  
8 550 observational studies and give rise to more pragmatic trials. *J Clin Epidemiol.*  
9 551 2017.
- 12 552 35. Hemkens LG, Benchimol EI, Langan SM, Briel M, Kasenda B, Januel JM,  
13 553 et al. The reporting of studies using routinely collected health data was often  
14 554 insufficient. *J Clin Epidemiol.* 2016;79:104-11.
- 17 555 36. Schwartz D, Lellouch J. Explanatory and pragmatic attitudes in  
18 556 therapeutical trials. *J Chronic Dis.* 1967;20(8):637-48.
- 20 557 37. Karanicolas PJ, Montori VM, Devereaux PJ, Schunemann H, Guyatt GH.  
21 558 A new 'mechanistic-practical" framework for designing and interpreting  
22 559 randomized trials. *J Clin Epidemiol.* 2009;62(5):479-84.
- 25 560 38. Lester WT, Grant RW, Barnett GO, Chueh HC. Randomized controlled  
26 561 trial of an informatics-based intervention to increase statin prescription for  
27 562 secondary prevention of coronary disease. *J Gen Intern Med.* 2006;21(1):22-  
28 563 9.
- 31 564 39. D'Avolio L, Ferguson R, Goryachev S, Woods P, Sabin T, O'Neil J, et al.  
32 565 Implementation of the Department of Veterans Affairs' first point-of-care  
33 566 clinical trial. *J Am Med Inform Assoc.* 2012;19(e1):e170-6.
- 35 567 40. Speich B, von Niederhäusern B, Schur N, Hemkens LG, Fürst T,  
36 568 Bhatnagar N, et al. Systematic review on costs and resource use of  
37 569 randomised clinical trials shows a lack of transparent and comprehensive  
38 570 data. *Journal of Clinical Epidemiology.* 2017.
- 41 571 41. Edwards SJ, Lilford RJ, Braunholtz DA, Jackson JC, Hewison J, Thornton  
42 572 J. Ethical issues in the design and conduct of randomised controlled trials.  
43 573 *Health Technol Assess.* 1998;2(15):i-vi, 1-132.
- 46 574 42. Baum M. Do we need informed consent? *Lancet.* 1986;2(8512):911-2.
- 47  
48  
49  
50  
51  
52  
53  
54  
55  
56  
57  
58  
59  
60

## FIGURES

**Figure 1: Flow-chart:**

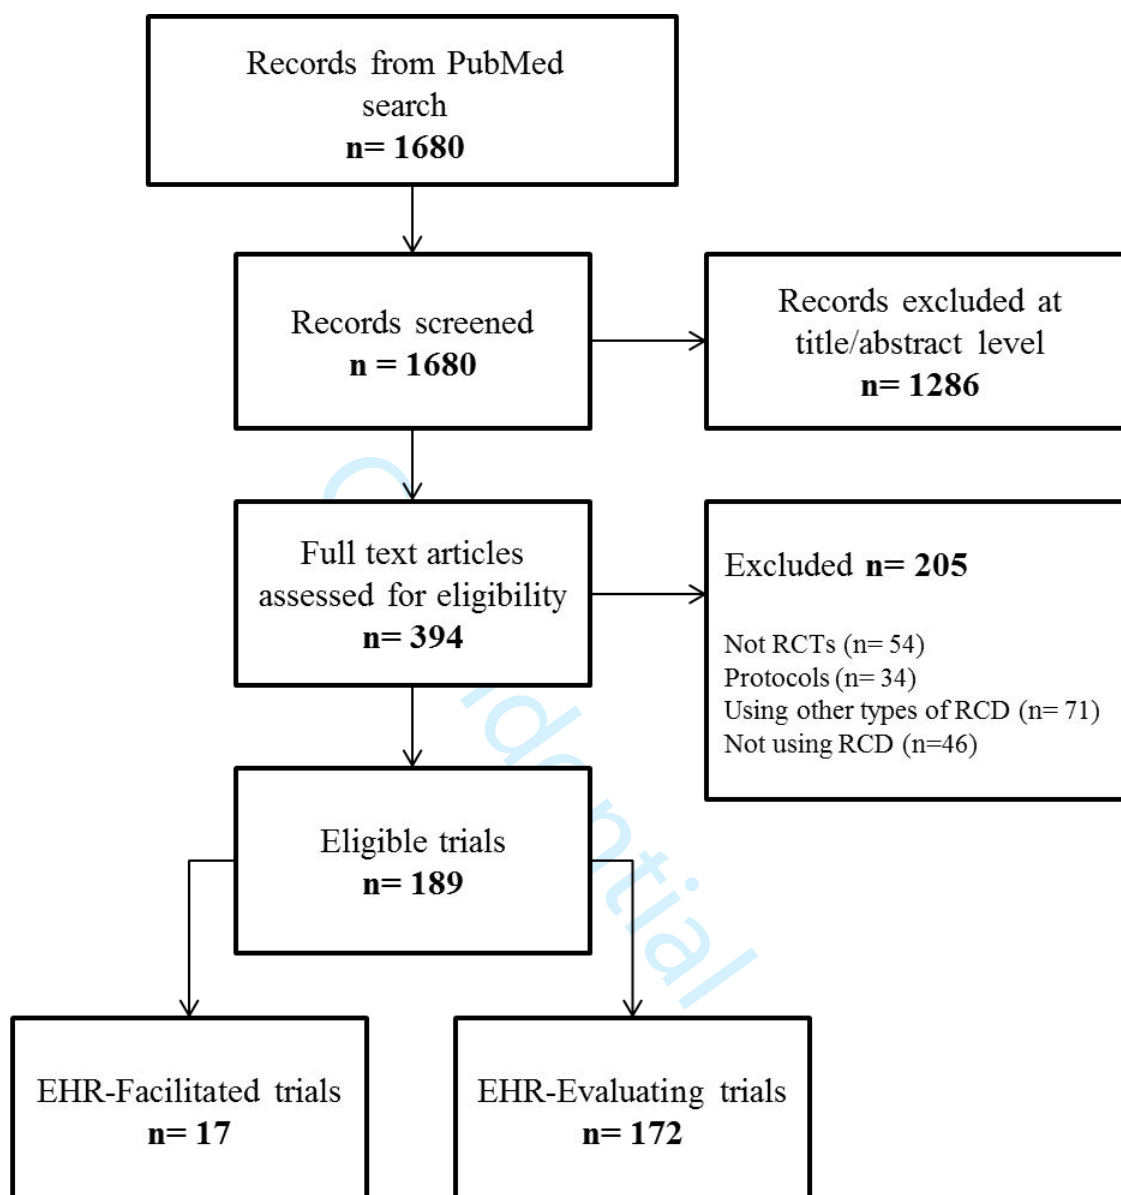

EHR: Electronic health records; RCD: Routinely collected data; RCT: Randomized controlled trial

## TABLES

**Table 1: Characteristics of all RCTs using Electronic Health Records**

|  | EHR overall |   | EHR-trials, EHR-evaluating trials |   | EHR-supported trials |   |
|--|-------------|---|-----------------------------------|---|----------------------|---|
|  | N           | % | N                                 | % | N                    | % |



|                                                                       |                    |        |                    |        |                    |        |
|-----------------------------------------------------------------------|--------------------|--------|--------------------|--------|--------------------|--------|
| Total                                                                 | 189                | (100%) | 172                | (100%) | 17                 | (100%) |
| EHR for intervention                                                  | 172                | (91%)  | 172                | (100%) | -                  | -      |
| ▪ Computerized decision or physician order entering system (CPOE/CDS) | 128                | (68%)  | 128                | (75%)  | -                  | -      |
| ▪ Telehealth                                                          | 14                 | (7%)   | 14                 | (8%)   | -                  | -      |
| ▪ Personal health record (PHR)                                        | 26                 | (14%)  | 26                 | (15%)  | -                  | -      |
| ▪ Electronic patient reported outcomes (ePRO)                         | 4                  | (2%)   | 4                  | (2%)   | -                  | -      |
| EHR for outcome measurement                                           | 158                | (84%)  | 143                | (83%)  | 15                 | (88%)  |
| EHR for patient recruitment                                           | 105                | (55%)  | 91                 | (53%)  | 14                 | (82%)  |
| Country                                                               |                    |        |                    |        |                    |        |
| ▪ North America                                                       | 153                | (81%)  | 140                | (81%)  | 13                 | (76%)  |
| ▪ UK                                                                  | 9                  | (5%)   | 7                  | (4%)   | 2                  | (12%)  |
| ▪ Continental Europe                                                  | 15                 | (8%)   | 14                 | (8%)   | 1                  | (6%)   |
| ▪ Other*                                                              | 12                 | (6%)   | 11                 | (7%)   | 1                  | (6%)   |
| Cluster-RCT                                                           | 64                 | (34%)  | 61                 | (35%)  | 3                  | (18%)  |
| Unit of randomization:                                                |                    |        |                    |        |                    |        |
| ▪ Clinicians                                                          | 49                 | (26%)  | 46                 | (27%)  | 3                  | (18%)  |
| ▪ Patients                                                            | 76                 | (40%)  | 65                 | (38%)  | 11                 | (65%)  |
| ▪ Pharmacies                                                          | 1                  | (<1%)  | 1                  | (<1%)  | 0                  | (0%)   |
| ▪ Practice/Clinic                                                     | 54                 | (28%)  | 51                 | (29%)  | 3                  | (18%)  |
| ▪ Unit/Floor                                                          | 9                  | (5%)   | 9                  | (5%)   | 0                  | (0%)   |
| Publication year                                                      | 2012 (2009 - 2014) | -      | 2012 (2009 - 2014) | -      | 2013 (2010 - 2013) | -      |
| Sample size**:                                                        |                    |        |                    |        |                    |        |
| ▪ Total                                                               | 89 (24 - 732)      |        | 80 (22 - 513)      |        | 732 (73-2513)      |        |
| ▪ Cluster-RCT excluded                                                | 239 (57 - 1187)    |        | 254 (60 - 1187)    |        | 900 (111 - 3075)   |        |
| ▪ Cluster-RCTs only                                                   | 24 (12 - 47)       |        | 24 (12 - 52)       |        | 18 (12-24)         |        |
| Blinding:                                                             |                    |        |                    |        |                    |        |
| ▪ Open label                                                          | 27                 | (14%)  | 23                 | (13%)  | 4                  | (24%)  |
| ▪ Single blinded                                                      | 19                 | (10%)  | 18                 | (11%)  | 1                  | (6%)   |
| ▪ Double blinded                                                      | 7                  | (4%)   | 6                  | (3%)   | 1                  | (6%)   |
| ▪ Outcome assessment blinded                                          | 35                 | (19%)  | 30                 | (17%)  | 5                  | (29%)  |
| ▪ Not reported                                                        | 101                | (53%)  | 95                 | (55%)  | 6                  | (35%)  |
| Placebo use                                                           | 0                  | (0%)   | 0                  | (0%)   | 0                  | (0%)   |

\*Other: includes China, Japan, Taiwan, Iran, India, Pakistan, Lebanon, Australia and Kenya.

\*\*Data are medians and IQR if not stated otherwise.

Abbreviations: EHR, Electronic health record; RCT, Randomized clinical trial.

**Table 2: Characteristics of EHR-supported trials**

| <b>Trial Year</b>                           | <b>Country</b>                                                                                   | <b>EHR use for Recruitment Type</b> | <b>EHR use for Outcome assessment</b>         | <b>Patient population/ Indication</b> | <b>Intervention and Control**</b>                                                                                 | <b>Primary Outcome</b>                                                                                                         | <b>Setting</b>                                                              |
|---------------------------------------------|--------------------------------------------------------------------------------------------------|-------------------------------------|-----------------------------------------------|---------------------------------------|-------------------------------------------------------------------------------------------------------------------|--------------------------------------------------------------------------------------------------------------------------------|-----------------------------------------------------------------------------|
|                                             | <b>Sample size</b>                                                                               |                                     | <b>Extent of RCD use*</b>                     |                                       |                                                                                                                   | <b>Follow-up (FU)</b>                                                                                                          |                                                                             |
|                                             |                                                                                                  |                                     |                                               |                                       |                                                                                                                   | <b>Missing data</b>                                                                                                            |                                                                             |
| Bereznicki, Peterson, et al.(17)<br>2008    | Australia<br>1551 patients                                                                       | Yes<br>Retrospective                | Yes<br>EHR alone                              | Uncontrolled asthma                   | Intervention: Contact by community pharmacist, plus educational material and referral to GP for asthma management | Ratio of dispensed preventer and reliever medication<br><br>FU: 6 months<br>Missing data: NR                                   | Community pharmacy network                                                  |
| Corson, Doak, et al(18)<br>2011<br>(SEACAP) | USA<br>42 care givers randomized<br>(365 patients)                                               | No<br>Prospective                   | Yes<br>Hybrid;<br>Primary outcome EHR alone   | Musculoskeletal pain                  | Intervention: Patient and clinician education, symptom monitoring and feedback to clinicians                      | Guideline–concordant care<br><br>FU: 12 months<br>Missing data: NR                                                             | Primary care clinics associated with VA medical center and a urban hospital |
| de Jong, Visser, et al(19)<br>2013          | Netherlands<br>73 general practitioner trainees randomized<br><br>(No. of patients not reported) | Yes<br>Retrospective                | Yes<br>Hybrid;<br>Primary outcome EHR alone   | Skin and psychosocial conditions      | Steering patient mix of general practitioner trainees                                                             | Trainees exposure to specific field (patient mix); knowledge and self-efficacy<br><br>FU: 6 months<br><br>Missing data: 5%-10% | Practice network with GP training program                                   |
| Fu, van Ryn, et al.(20)<br>2014             | USA<br>6400 patients                                                                             | Yes<br>Retrospective                | Yes<br>Hybrid;<br>Primary outcome active data | Current smokers                       | Proactive outreach plus choice of smoking cessation services                                                      | 6-month prolonged smoking, abstinence at 1 year<br><br>FU: 12 months                                                           | Veteran’s Affair medical center                                             |

1  
2  
3  
4  
5  
6  
7  
8  
9  
10  
11  
12  
13  
14  
15  
16  
17  
18  
19  
20  
21  
22  
23  
24  
25  
26  
27  
28  
29  
30  
31  
32  
33  
34  
35  
36  
37  
38  
39  
40  
41  
42  
43  
44  
45  
46

|                                         |                                                                     |                      |                                                                |                                                                                                                |                                                                            |                                                                                                                                                                                     |                                                            |
|-----------------------------------------|---------------------------------------------------------------------|----------------------|----------------------------------------------------------------|----------------------------------------------------------------------------------------------------------------|----------------------------------------------------------------------------|-------------------------------------------------------------------------------------------------------------------------------------------------------------------------------------|------------------------------------------------------------|
|                                         |                                                                     |                      | collection alone                                               |                                                                                                                |                                                                            | Missing data: 48.3% (but 0% for EHR outcome)                                                                                                                                        |                                                            |
| Galbreath, Krasuski, et al.(21)<br>2004 | USA<br>1069 patients                                                | Yes<br>Retrospective | Yes<br>Hybrid;<br>Primary outcome active data collection alone | Symptomatic congestive heart failure                                                                           | Congestive heart failure management program (plus at-home scale)           | All-cause mortality and healthcare utilization<br>FU: NR, time to event<br>Missing data: NR                                                                                         | Various healthcare networks and Medicare/-aid participants |
| Gerber, Prasad, et al.(22)<br>2013      | USA<br>18 practices, 170 caregivers randomized<br>(185212 patients) | Yes<br>Retrospective | Yes<br>Hybrid;<br>Primary outcome hybrid                       | Clinical practice groups with primary care pediatricians<br>(Children with acute respiratory tract infections) | Antibiotic stewardship program                                             | Change in broad spectrum antibiotics prescribed for bacterial infections or change in antibiotic prescribed for viral infections<br>FU: 12 months<br>Missing data: 5% of caregivers | Pediatric primary care network                             |
| Green, Wang, et al.(23)<br>2013         | USA<br>4675 patients                                                | Yes<br>Retrospective | Yes<br>EHR alone                                               | Prevention of colorectal cancer                                                                                | Automated Interventions, vs Assisted care vs Navigated care, vs Usual care | Receiving any colorectal cancer test and being current for colorectal cancer testing in years 1 and 2.<br>FU: 24 months<br>Missing data: 0.2%                                       | Primary care practice network                              |

|                                                  |                                         |                                                  |                      |                                    |                                                                                                                  |                                                                                                                                       |                                                                                               |                                                                                           |
|--------------------------------------------------|-----------------------------------------|--------------------------------------------------|----------------------|------------------------------------|------------------------------------------------------------------------------------------------------------------|---------------------------------------------------------------------------------------------------------------------------------------|-----------------------------------------------------------------------------------------------|-------------------------------------------------------------------------------------------|
| 1<br>2<br>3<br>4<br>5<br>6<br>7                  | Hoffman, Steel, et al.(24)<br>2010      | USA<br>404 patients                              | Yes<br>Retrospective | No<br>Active data collection alone | Prevention of colorectal cancer                                                                                  | Fecal Immunochemical test<br>(vs Guaiac-based occult blood test)                                                                      | Screening adherence<br>FU: 3 months<br>Missing data: NR                                       | VA network (primary care clinics and laboratory)                                          |
| 8<br>9<br>10<br>11<br>12<br>13<br>14<br>15<br>16 | Israel, Farley, et al.(25)<br>2013      | USA<br>732 patients                              | Yes<br>Retrospective | No<br>Active data collection alone | Inpatient adults with at least one of several cardiovascular disease diagnoses in EHR                            | Minimal intervention (medication reconciliation) or enhanced intervention (minimal intervention plus pharmacist) follow-up usual care | Rate of underutilization of cardiovascular drugs<br>FU: 3 months<br>Missing data: NR          | University hospital (orthopedic, internal medicine, family medicine and cardiology wards) |
| 17<br>18<br>19<br>20<br>21<br>22<br>23           | McCarren, Furmaga, et al.(26)<br>2013   | USA<br>12 practices randomized<br>(220 patients) | Yes<br>Retrospective | Yes<br>EHR alone                   | Heart failure and guideline nonconcordant beta-blocker prescription                                              | Information to pharmacy about prescription non-concordance                                                                            | Guideline concordant prescriptions<br>FU: 6 months<br>Missing data: 0%                        | VHA facilities and pharmacies                                                             |
| 24<br>25<br>26<br>27<br>28<br>29                 | Phillips, Rothstein, et al.(28)<br>2011 | USA<br>3895 patients                             | Yes<br>Retrospective | Yes<br>EHR alone                   | Prevention of breast cancer                                                                                      | Quality improvement patient navigation                                                                                                | Adherence to biennial mammography<br>FU: 9 months<br>Missing data: NR                         | Hospital-based internal medicine practices                                                |
| 30<br>31<br>32<br>33<br>34<br>35<br>36           | Piazza, Anderson, et al.(29)<br>2013    | USA<br>2513 patients                             | Yes<br>Retrospective | Yes<br>EHR alone                   | Hospitalized medical service's patients at risk for venous thromboembolism and planned discharge within 48 hours | Alert for physician                                                                                                                   | Symptomatic deep vein thrombosis or pulmonary embolism<br>FU: 3 months<br>Missing data: <0.1% | Inpatient medical unit                                                                    |

|    |             |                |               |             |                        |                         |                        |                   |
|----|-------------|----------------|---------------|-------------|------------------------|-------------------------|------------------------|-------------------|
| 1  |             |                |               |             |                        |                         |                        |                   |
| 2  |             |                |               |             |                        |                         |                        |                   |
| 3  | Qureshi,    | UK             | No            | Yes         | Adult primary care     | Family history          | Proportion of          | Family practices  |
| 4  | Armstrong,  | 24 caregivers  | Prospective   | Hybrid;     | patients no previously | questionnaire (in       | identified             | in research       |
| 5  | et al.(30)  | randomized     |               | Primary     | diagnosed              | addition to             | participants with high | network           |
| 6  | 2012        | (748 patients) |               | outcome EHR | cardiovascular risk    | Framingham risk         | cardiovascular risk    |                   |
| 7  |             |                |               | alone       |                        | score)                  | scores                 |                   |
| 8  |             |                |               |             |                        |                         |                        |                   |
| 9  |             |                |               |             |                        |                         | FU: NA                 |                   |
| 10 |             |                |               |             |                        |                         | Missing data: 1.7%     |                   |
| 11 |             |                |               |             |                        |                         |                        |                   |
| 12 | Skinner,    | USA            | Yes           | Yes         | Prevention of          | Tablet-based Cancer     | Received risk-         | Family practices  |
| 13 | Halm, et    | 1032 patients  | Retrospective | EHR alone   | colorectal cancer      | Risk Intake System      | appropriate            | affiliated with a |
| 14 | al.(31)     |                |               |             |                        | (CRIS) assessment       | colorectal cancer      | university        |
| 15 | 2015        |                |               |             |                        | prior to an             | testing and any type   | medical center    |
| 16 |             |                |               |             |                        | appointment (tailored   | of colorectal cancer   |                   |
| 17 |             |                |               |             |                        | and non-tailored) and   | testing                |                   |
| 18 |             |                |               |             |                        | control group           |                        |                   |
| 19 |             |                |               |             |                        |                         | FU: 12 months          |                   |
| 20 |             |                |               |             |                        |                         | Missing data: 0%       |                   |
| 21 |             |                |               |             |                        |                         |                        |                   |
| 22 | Stewart,    | USA            | Yes           | Yes         | Dysthymia or major     | Collaborative care      | Cardiovascular         | Academic group    |
| 23 | Perkins, et | 235 patients   | Retrospective | Hybrid;     | depressive disorder    | program with            | events                 | practice          |
| 24 | al.(27)     |                |               | Primary     |                        | psychotherapy and       | FU: 96 months (8       |                   |
| 25 | 2014        |                |               | outcome EHR |                        | antidepressant drugs    | years)                 |                   |
| 26 |             |                |               | alone       |                        |                         | Missing data: 0%       |                   |
| 27 |             |                |               |             |                        |                         |                        |                   |
| 28 |             |                |               |             |                        |                         |                        |                   |
| 29 | Vestbo, et  | UK             | No            | Yes         | COPD and regular       | Once a day inhaled      | Moderate or severe     | Healthcare        |
| 30 | al.(32)     | 2802 patients  | Prospective   | Hybrid;     | maintenance inhaler    | fluticasone furoate 100 | COPD exacerbations     | network in (and   |
| 31 | 2016        |                |               | Primary     | therapy                | µg and vilanterol 25 µg | FU: 12 months          | around) Salford,  |
| 32 |             |                |               | outcome     |                        |                         | Missing data: 24.8%    | hospitals, GPs,   |
| 33 | (Salford    |                |               | active data |                        |                         |                        | pharmacies        |
| 34 | Lung Study) |                |               | collection  |                        |                         |                        |                   |
| 35 |             |                |               | alone       |                        |                         |                        |                   |
| 36 |             |                |               |             |                        |                         |                        |                   |
| 37 |             |                |               |             |                        |                         |                        |                   |
| 38 |             |                |               |             |                        |                         |                        |                   |
| 39 |             |                |               |             |                        |                         |                        |                   |
| 40 |             |                |               |             |                        |                         |                        |                   |
| 41 |             |                |               |             |                        |                         |                        |                   |
| 42 |             |                |               |             |                        |                         |                        |                   |
| 43 |             |                |               |             |                        |                         |                        |                   |
| 44 |             |                |               |             |                        |                         |                        |                   |
| 45 |             |                |               |             |                        |                         |                        |                   |
| 46 |             |                |               |             |                        |                         |                        |                   |

|                           |                                                                       |                      |                  |                                 |                                             |                                                                         |                         |   |
|---------------------------|-----------------------------------------------------------------------|----------------------|------------------|---------------------------------|---------------------------------------------|-------------------------------------------------------------------------|-------------------------|---|
| 1                         | 2                                                                     | 3                    | 4                | 5                               | 6                                           | 7                                                                       | 8                       | 9 |
| Wolf, Fitzner, et al.(33) | USA<br>113 health-care provider (randomized)<br>2005<br>1290 patients | Yes<br>Retrospective | Yes<br>EHR alone | Prevention of colorectal cancer | Education session plus performance feedback | Completion of colorectal cancer screening<br>FU: NA<br>Missing data: NR | VA primary care clinics |   |

\*The extent of RCD use can be: EHR alone (all of the RCT's outcomes are routinely collected), Hybrid (either the primary outcome or other outcomes are entirely routinely collected and some outcome in the RCT is also entirely actively collected, or some outcomes are routinely collected and supplemented by active data collections) and Active data collection alone (all of the outcomes are actively collected, no RCD).

\*\*All comparisons are "usual care" unless otherwise specified.

<sup>1</sup>University of Texas Health Science Center at San Antonio, in partnership with Wilford Hall Medical Center, Brooke Army Medical Center, South Texas Veterans Health Care System, TRICARE Region 6, and University Health System.

Abbreviations: COPD, chronic obstructive pulmonary disease; EHR, electronic health record; EMR, electronic medical record; GP, general practitioner; QOL, quality of life; RMDQ, Roland Morris Disability Questionnaire; VA, Veterans Affairs; VHA, Veterans Health Administration.



**Table 3: Costs of EHR-supported trials**

| <b>EHR trial Author, Year</b>                                                                                                                                                                                                                                                                                                                                                                                                                                                                                                                                                                                                               | <b>EHR use for</b>                                                     | <b>EHR source pre-existing</b> | <b>Intervention integrated during routine care (no additional staff needed)</b> | <b>Total trial cost in US\$</b> | <b>N patients</b> | <b>Per patient cost in US\$</b> |
|---------------------------------------------------------------------------------------------------------------------------------------------------------------------------------------------------------------------------------------------------------------------------------------------------------------------------------------------------------------------------------------------------------------------------------------------------------------------------------------------------------------------------------------------------------------------------------------------------------------------------------------------|------------------------------------------------------------------------|--------------------------------|---------------------------------------------------------------------------------|---------------------------------|-------------------|---------------------------------|
| <b>Automatic data extraction from EHR source</b>                                                                                                                                                                                                                                                                                                                                                                                                                                                                                                                                                                                            |                                                                        |                                |                                                                                 |                                 |                   |                                 |
| Bereznicki, Peterson, et al. 2008                                                                                                                                                                                                                                                                                                                                                                                                                                                                                                                                                                                                           | Recruitment (retrospective)<br>Outcome assessment (all with EHR alone) | Yes                            | Yes                                                                             | 67750 <sup>1</sup>              | 1551              | 44                              |
| <b>Manual data extraction from EHR source</b>                                                                                                                                                                                                                                                                                                                                                                                                                                                                                                                                                                                               |                                                                        |                                |                                                                                 |                                 |                   |                                 |
| Green, Wang, et al. 2013                                                                                                                                                                                                                                                                                                                                                                                                                                                                                                                                                                                                                    | Recruitment (retrospective)<br>Outcome assessment (all with EHR alone) | Yes                            | No                                                                              | 2800000 <sup>2</sup>            | 5000              | 560                             |
| Piazza, Anderson, et al. 2013                                                                                                                                                                                                                                                                                                                                                                                                                                                                                                                                                                                                               | Recruitment (retrospective)<br>Outcome assessment (all with EHR alone) | unclear                        | No                                                                              | 5026000 <sup>3</sup>            | 2513              | 2'000                           |
| Wolf, Fitzner, et al. 2005                                                                                                                                                                                                                                                                                                                                                                                                                                                                                                                                                                                                                  | Recruitment (retrospective)<br>Outcome assessment (all with EHR alone) | Yes                            | Yes                                                                             | 86753 <sup>4</sup>              | 1978              | 44                              |
| <b>Unclear if data extraction from EHR source was automatic or manual</b>                                                                                                                                                                                                                                                                                                                                                                                                                                                                                                                                                                   |                                                                        |                                |                                                                                 |                                 |                   |                                 |
| McCarren, Furmaga, et al. 2013                                                                                                                                                                                                                                                                                                                                                                                                                                                                                                                                                                                                              | Recruitment (retrospective)<br>Outcome assessment (all with EHR alone) | Yes                            | Yes                                                                             | 69300 <sup>5</sup>              | 220               | 315                             |
| <sup>1</sup> Total received funding; including USD 42157 for staff costs for the duration of the project, USD 6132 for a consultant programmer (for software development), USD 15330 for pharmacy payments and USD 6132 for non-salary costs such as printing, postage, travel, and others.<br><sup>2</sup> Total received funding.<br><sup>3</sup> The study costs were USD 2000 per patient and included costs of the trial startup and close out.<br><sup>4</sup> Total cost of the colorectal cancer screening promotional effort (intervention only).<br><sup>5</sup> Total received funding. "Most of the [working] time was donated" |                                                                        |                                |                                                                                 |                                 |                   |                                 |

## APPENDICES

### Appendix 1: Box - Definitions, types and applications of Electronic Health Records (EHRs)

| <i>EHR type</i>                                         | <i>Definition</i>                                                                                                                                                                                                                                                                                                                                                                                                                                                                                                                                                                                                                                                                |
|---------------------------------------------------------|----------------------------------------------------------------------------------------------------------------------------------------------------------------------------------------------------------------------------------------------------------------------------------------------------------------------------------------------------------------------------------------------------------------------------------------------------------------------------------------------------------------------------------------------------------------------------------------------------------------------------------------------------------------------------------|
| <b>Electronic Health Record (EHR)</b>                   | EHRs are electronic platforms that contain health-related data collected during medical care in practices, clinics and other medical settings from various sources, connected to form a network of patient clinical data. EHRs can also incorporate software that allow straightforward physician ordering practice (CPOEs), even including safety features; or that guide them through clinical decision making with up-to-date guidelines (CDS).                                                                                                                                                                                                                               |
| <b>Electronic Medical Record (EMR)</b>                  | EMR are routinely collected data sources that contain standard medical and clinical data gathered during medical care in an individual location of a practice, clinic or other medical setting. When the data is shared among different locations and units it becomes a network and it is considered an EHR (i.e. a primary care practice with electronic chart system that cannot be accessed by any other entity is an EMR, a hospital system where laboratory data, affiliated clinic charts, etc., are all accessed under one platform, is an EHR).                                                                                                                         |
| <i>EHR applications</i>                                 | <i>Definition</i>                                                                                                                                                                                                                                                                                                                                                                                                                                                                                                                                                                                                                                                                |
| <b>Personal Health Records (PHR)</b>                    | PHRs are electronic platforms (often online interfaces such as web pages) that securely store patient's health information and allow patients to actively engage in their own health. Often, they can add information to a PHR, can exchange it with health providers, see test results, make appointments, or receive educational information. We consider PHR only those platforms that are tethered to an EHR, where information can be exchanged in both directions (otherwise if the patient is simply adding data but not viewing any of his/her data, we consider it ePRO).                                                                                               |
| <b>Clinical Decision Support System (CDSS)</b>          | A CDSS is an application that supports health providers in performing health care by mining data of an EHR or EMR and providing guideline specific recommendations. CDSS systems can often identify errors or missing data and display alerts or messages through the EHR.                                                                                                                                                                                                                                                                                                                                                                                                       |
| <b>Computerized Physician Order Entry (CPOE) system</b> | CPOE systems are electronic ordering technology where physician orders can be entered and processed in a computerized way, often mimicking the workflow found in clinical settings. CPOEs can be more advanced and identify ordering mistakes, display preferred treatments by individual patient EHR query, or even set up blocks with medication interaction orders.                                                                                                                                                                                                                                                                                                           |
| <b>Telehealth</b>                                       | Telehealth is the use of telecommunication technologies (telemonitoring) to improve the provision of care. This allows for care to be provided at a distance and therefore to maintain clinical contact with patients at home without requiring the same amount of resources to be dispensed. Examples of telehealth are blood glucose monitoring machines tethered to an EHR that integrate blood glucose levels taken by the patient at home into the EHR automatically (and can send an alert in the EHR interface to the clinician if the values are out of a predefined range and action must be taken); and increasingly mobile health data collected by wearable devices. |
| <b>Electronic Patient Reported Outcomes (ePRO)</b>      | ePROs are health related information recorded by the patient themselves in electronic form, often through a web page or application. While ePROs have often been utilized in clinical trials, we also consider ePROs any data that have been collected by the patients themselves and tethered to an EHR or PHR. An example would be a patient pain diary, in which a pain score and information are inputted                                                                                                                                                                                                                                                                    |

1  
2  
3  
4  
5  
6  
7  
8  
9  
10  
11  
12  
13  
14  
15  
16  
17  
18  
19  
20  
21  
22  
23  
24  
25  
26  
27  
28  
29  
30  
31  
32  
33  
34  
35  
36  
37  
38  
39  
40  
41  
42  
43  
44  
45  
46  
47  
48  
49  
50  
51  
52  
53  
54  
55  
56  
57  
58  
59  
60

|                                                                                                                                             |                                                                                                                                                  |
|---------------------------------------------------------------------------------------------------------------------------------------------|--------------------------------------------------------------------------------------------------------------------------------------------------|
|                                                                                                                                             | daily on a webpage or via a smartphone app and these data are added to an EHR; where the clinician can monitor it and consult it during a visit. |
| <b>These definitions are our own working definitions used for this project and have been adapted from HealthIT.gov(10) and CMS.gov(12).</b> |                                                                                                                                                  |

Confidential

## Appendix 2: Search strategy

| Search | Query                                                                                                                                                                                                                                                                                                                                                                                                                                                                                                                                                                                                                                                                                                                                                                                                                                                                                                                                                                                                                                                                                                                                                                                                                                                                                                                                                                                                                                                                                                                                                                                                                                                                                                                                                                                                                                                                                                                                                                                                                                                                                                                                                                                                                                                                                                                                                                                                                                                                                                                                                                                                                                                                                                                                                                                                                                                                                                                                                                                                                                                                                                                                                                                                                                                                                                                                                                                                                                                                                                                                                                                                                                                                                                                                                                                                                                                                                                                                                                                         |
|--------|-----------------------------------------------------------------------------------------------------------------------------------------------------------------------------------------------------------------------------------------------------------------------------------------------------------------------------------------------------------------------------------------------------------------------------------------------------------------------------------------------------------------------------------------------------------------------------------------------------------------------------------------------------------------------------------------------------------------------------------------------------------------------------------------------------------------------------------------------------------------------------------------------------------------------------------------------------------------------------------------------------------------------------------------------------------------------------------------------------------------------------------------------------------------------------------------------------------------------------------------------------------------------------------------------------------------------------------------------------------------------------------------------------------------------------------------------------------------------------------------------------------------------------------------------------------------------------------------------------------------------------------------------------------------------------------------------------------------------------------------------------------------------------------------------------------------------------------------------------------------------------------------------------------------------------------------------------------------------------------------------------------------------------------------------------------------------------------------------------------------------------------------------------------------------------------------------------------------------------------------------------------------------------------------------------------------------------------------------------------------------------------------------------------------------------------------------------------------------------------------------------------------------------------------------------------------------------------------------------------------------------------------------------------------------------------------------------------------------------------------------------------------------------------------------------------------------------------------------------------------------------------------------------------------------------------------------------------------------------------------------------------------------------------------------------------------------------------------------------------------------------------------------------------------------------------------------------------------------------------------------------------------------------------------------------------------------------------------------------------------------------------------------------------------------------------------------------------------------------------------------------------------------------------------------------------------------------------------------------------------------------------------------------------------------------------------------------------------------------------------------------------------------------------------------------------------------------------------------------------------------------------------------------------------------------------------------------------------------------------------------|
| #12    | (#11 AND #10)                                                                                                                                                                                                                                                                                                                                                                                                                                                                                                                                                                                                                                                                                                                                                                                                                                                                                                                                                                                                                                                                                                                                                                                                                                                                                                                                                                                                                                                                                                                                                                                                                                                                                                                                                                                                                                                                                                                                                                                                                                                                                                                                                                                                                                                                                                                                                                                                                                                                                                                                                                                                                                                                                                                                                                                                                                                                                                                                                                                                                                                                                                                                                                                                                                                                                                                                                                                                                                                                                                                                                                                                                                                                                                                                                                                                                                                                                                                                                                                 |
| #11    | ((health information exchange [tw] OR hie [tw] OR rhio [tw] OR regional health information organization [tw] OR hl7 [tw] OR health level seven [tw] OR unified medical language system [majr] OR umls [tw] OR loinc [tw] OR rxnorm [tw] OR snomed [tw] OR icd9 cm [ti] OR icd 9 cm [ti] OR icd10 [ti] OR icd 10 [ti] OR metathesaurus [tw] OR patient card [tw] OR patient cards [tw] OR health card [tw] OR health cards [tw] OR electronic health data [tw] OR personal health data [tw] OR personal health record [tw] OR personal health records [tw] OR Health Records, Personal [Majr] OR Health Record, Personal [Majr] OR ehealth [tw] OR e-health [tw] OR medical informatics application [mh] OR medical informatics applications [mh] OR medical records system, computerized [mh] OR medical records systems, computerized [mh] OR computerized patient medical records [tw] OR automated medical record system [tw] OR automated medical record systems [tw] OR automated medical records system [tw] OR automated medical records systems [tw] OR computerized medical record [tw] OR computerized medical records [tw] OR computerized patient records [tw] OR computerized patient record [tw] OR computerized patient medical record [tw] OR electronic health record [tw] OR electronic health records [tw] OR Electronic Health Record [Majr] OR Electronic Health Records [Majr] OR electronic patient record [tw] OR electronic patient records [tw] OR electronic medical record [tw] OR electronic medical records [tw] OR electronic healthcare records [tw] OR electronic healthcare record [tw] OR electronic health care record [tw] OR electronic health care records [tw] OR archives [majr] OR ehr [tw] OR ehrs [tw] OR phr [tw] OR phrs [tw] OR emr [tw] OR emr[tw] OR Health Information Systems [Majr]) AND (medical record [ti] OR medical records [mh] OR medical records [ti] OR patient record [ti] OR patient records [ti] OR patient health record [ti] OR patient health records [ti] OR patient identification system [mh] OR patient identification systems [mh] OR Patient Outcome Assessment[Majr] OR Patient Discharge Summaries[Majr] OR healthcare record [ti] OR healthcare records [ti] OR health care record [ti] OR health care records [ti] OR health record [ti] OR health records [ti] OR hospital information system [tw] OR hospital information systems [tw] OR umae [ti] OR attitude to computers [mh] OR medical informatics [ti])) OR ((medical records systems, computerized [majr] OR medical records systems, computerized [mh] OR computerized patient medical record [tw] OR computerized patient medical records [tw] OR automated medical record system [tw] OR automated medical record systems [tw] OR automated medical records system [tw] OR automated medical records systems [tw] OR computerized medical record [tw] OR computerized medical records [tw] OR computerized patient records [tw] OR computerized patient record [tw] OR electronic health record [tw] OR electronic health records [tw] OR electronic patient record [tw] OR electronic patient records [tw] OR electronic medical record [tw] OR electronic medical records [tw] OR electronic healthcare records [tw] OR electronic healthcare record [tw] OR electronic health care record [tw] OR electronic health care records [tw] OR unified medical language system [majr] OR unified medical language system [tw] OR umls [tw] OR loinc [tw] OR rxnorm [tw] OR snomed [tw] OR icd9 cm [ti] OR icd 9 cm [ti] OR icd10 [ti] OR icd 10 [ti] OR Metathesaurus [tw] OR ehr [tw] OR ehrs [tw] OR phr [tw] OR phrs [tw] OR emr [tw] OR emrs [tw] OR meaningful use [tiab] OR meaningful use [tw]OR Meaningful Use [Majr]) AND (j ahima [ta] OR j am med inform assoc [ta] OR amia annu symp proc [ta] OR health data manag [ta] OR int j med inform [ta] OR yearb med inform [ta] OR telemed j e health [ta] OR stud health technol inform [ta])) |
| #10    | (#8 NOT #9)                                                                                                                                                                                                                                                                                                                                                                                                                                                                                                                                                                                                                                                                                                                                                                                                                                                                                                                                                                                                                                                                                                                                                                                                                                                                                                                                                                                                                                                                                                                                                                                                                                                                                                                                                                                                                                                                                                                                                                                                                                                                                                                                                                                                                                                                                                                                                                                                                                                                                                                                                                                                                                                                                                                                                                                                                                                                                                                                                                                                                                                                                                                                                                                                                                                                                                                                                                                                                                                                                                                                                                                                                                                                                                                                                                                                                                                                                                                                                                                   |
| #9     | ((animals [mh] NOT humans [mh]))                                                                                                                                                                                                                                                                                                                                                                                                                                                                                                                                                                                                                                                                                                                                                                                                                                                                                                                                                                                                                                                                                                                                                                                                                                                                                                                                                                                                                                                                                                                                                                                                                                                                                                                                                                                                                                                                                                                                                                                                                                                                                                                                                                                                                                                                                                                                                                                                                                                                                                                                                                                                                                                                                                                                                                                                                                                                                                                                                                                                                                                                                                                                                                                                                                                                                                                                                                                                                                                                                                                                                                                                                                                                                                                                                                                                                                                                                                                                                              |
| #8     | ((#1 OR #2 OR #3 OR #4 OR #5 OR #6 OR #7))                                                                                                                                                                                                                                                                                                                                                                                                                                                                                                                                                                                                                                                                                                                                                                                                                                                                                                                                                                                                                                                                                                                                                                                                                                                                                                                                                                                                                                                                                                                                                                                                                                                                                                                                                                                                                                                                                                                                                                                                                                                                                                                                                                                                                                                                                                                                                                                                                                                                                                                                                                                                                                                                                                                                                                                                                                                                                                                                                                                                                                                                                                                                                                                                                                                                                                                                                                                                                                                                                                                                                                                                                                                                                                                                                                                                                                                                                                                                                    |
| #7     | trial [ti]                                                                                                                                                                                                                                                                                                                                                                                                                                                                                                                                                                                                                                                                                                                                                                                                                                                                                                                                                                                                                                                                                                                                                                                                                                                                                                                                                                                                                                                                                                                                                                                                                                                                                                                                                                                                                                                                                                                                                                                                                                                                                                                                                                                                                                                                                                                                                                                                                                                                                                                                                                                                                                                                                                                                                                                                                                                                                                                                                                                                                                                                                                                                                                                                                                                                                                                                                                                                                                                                                                                                                                                                                                                                                                                                                                                                                                                                                                                                                                                    |
| #6     | randomly [tiab]                                                                                                                                                                                                                                                                                                                                                                                                                                                                                                                                                                                                                                                                                                                                                                                                                                                                                                                                                                                                                                                                                                                                                                                                                                                                                                                                                                                                                                                                                                                                                                                                                                                                                                                                                                                                                                                                                                                                                                                                                                                                                                                                                                                                                                                                                                                                                                                                                                                                                                                                                                                                                                                                                                                                                                                                                                                                                                                                                                                                                                                                                                                                                                                                                                                                                                                                                                                                                                                                                                                                                                                                                                                                                                                                                                                                                                                                                                                                                                               |
| #5     | clinical trials as topic [mesh: noexp]                                                                                                                                                                                                                                                                                                                                                                                                                                                                                                                                                                                                                                                                                                                                                                                                                                                                                                                                                                                                                                                                                                                                                                                                                                                                                                                                                                                                                                                                                                                                                                                                                                                                                                                                                                                                                                                                                                                                                                                                                                                                                                                                                                                                                                                                                                                                                                                                                                                                                                                                                                                                                                                                                                                                                                                                                                                                                                                                                                                                                                                                                                                                                                                                                                                                                                                                                                                                                                                                                                                                                                                                                                                                                                                                                                                                                                                                                                                                                        |

1  
2  
3  
4  
5  
6  
7  
8  
9  
10  
11  
12  
13  
14  
15  
16  
17  
18  
19  
20  
21  
22  
23  
24  
25  
26  
27  
28  
29  
30  
31  
32  
33  
34  
35  
36  
37  
38  
39  
40  
41  
42  
43  
44  
45  
46  
47  
48  
49  
50  
51  
52  
53  
54  
55  
56  
57  
58  
59  
60

---

|    |                                  |
|----|----------------------------------|
| #4 | placebo [tiab]                   |
| #3 | randomized [tiab]                |
| #2 | controlled clinical trial [pt]   |
| #1 | randomized controlled trial [pt] |

---

***Interface: PubMed; Filters: English and date from 2000/01/01  
Date of last search: 13 September 2017***

Confidential

### Appendix 3: References of all included EHR-Evaluating RCTs

1. Adams, W. G., B. D. Phillips, J. D. Bacic, K. E. Walsh, C. W. Shanahan and M. K. Paasche-Orlow (2014). "Automated conversation system before pediatric primary care visits: a randomized trial." *Pediatrics* **134**(3): e691-699.
2. Adelman, J. S., G. E. Kalkut, C. B. Schechter, J. M. Weiss, M. A. Berger, S. H. Reissman, H. W. Cohen, S. J. Lorenzen, D. A. Burack and W. N. Southern (2013). "Understanding and preventing wrong-patient electronic orders: a randomized controlled trial." *J Am Med Inform Assoc* **20**(2): 305-310.
3. Ali, M. K., K. Singh, D. Kondal, R. Devarajan, S. A. Patel, R. Shivashankar, V. S. Ajay, A. G. Unnikrishnan, V. U. Menon, P. K. Varthakavi, V. Viswanathan, M. Dharmalingam, G. Bantwal, R. K. Sahay, M. Q. Masood, R. Khadgawat, A. Desai, B. Sethi, D. Prabhakaran, K. M. Narayan and N. Tandon (2016). "Effectiveness of a Multicomponent Quality Improvement Strategy to Improve Achievement of Diabetes Care Goals: A Randomized, Controlled Trial." *Ann Intern Med* **165**(6): 399-408.
4. Awdishu, L., C. R. Coates, A. Lyddane, K. Tran, C. E. Daniels, J. Lee and R. El-Kareh (2015). "The impact of real-time alerting on appropriate prescribing in kidney disease: a cluster randomized controlled trial." *J Am Med Inform Assoc*.
5. Azizi, A., R. Aboutorabi, Z. Mazloum-Khorasani, M. Afzal-Aghaea, H. Tabesh and M. Tara (2016). "Evaluating the Effect of Web-Based Iranian Diabetic Personal Health Record App on Self-Care Status and Clinical Indicators: Randomized Controlled Trial." *JMIR Med Inform* **4**(4): e32.
6. Baer, H. J., C. C. Wee, K. DeVito, E. J. Orav, J. P. Frolkis, D. H. Williams, A. Wright and D. W. Bates (2015). "Design of a cluster-randomized trial of electronic health record-based tools to address overweight and obesity in primary care." *Clin Trials* **12**(4): 374-383.
7. Bakerly, N. D., A. Woodcock, J. P. New, J. M. Gibson, W. Wu, D. Leather and J. Vestbo (2015). "The Salford Lung Study protocol: a pragmatic, randomised phase III real-world effectiveness trial in chronic obstructive pulmonary disease." *Respir Res* **16**: 101.
8. Beeler, P. E., E. Eschmann, A. Schumacher, J. D. Studt, B. Amann-Vesti and J. Blaser (2014). "Impact of electronic reminders on venous thromboprophylaxis after admissions and transfers." *J Am Med Inform Assoc* **21**(e2): e297-303.
9. Bell, L. M., R. Grundmeier, R. Localio, J. Zorc, A. G. Fiks, X. Zhang, T. B. Stephens, M. Swietlik and J. P. Guevara (2010). "Electronic health record-based decision support to improve asthma care: a cluster-randomized trial." *Pediatrics* **125**(4): e770-777.
10. Bender, B. G., P. J. Cvietusa, G. K. Goodrich, R. Lowe, H. A. Nuanes, C. Rand, S. Shetterly, C. Tacinas, W. M. Vollmer, N. Wagner, F. S. Wamboldt, S. Xu and D. J. Magid (2015). "Pragmatic trial of health care technologies to improve adherence to pediatric asthma treatment: a randomized clinical trial." *JAMA Pediatr* **169**(4): 317-323.
11. Bernstein, S. L., J. Rosner, M. DeWitt, J. Tetrault, A. L. Hsiao, J. Dziura, S. Sussman, P. O'Connor and B. Toll (2017). "Design and implementation of decision support for tobacco dependence treatment in an inpatient electronic medical record: a randomized trial." *Transl Behav Med* **7**(2): 185-195.
12. Bhardwaja, B., N. M. Carroll, M. A. Raebel, E. A. Chester, E. J. Korner, B. E. Rocho, D. W. Brand and D. J. Magid (2011). "Improving prescribing safety in patients with renal insufficiency in the ambulatory setting: the Drug Renal Alert Pharmacy (DRAP) program." *Pharmacotherapy* **31**(4): 346-356.
13. Bose-Brill, S., M. Kretovics, T. Ballenger, G. Modan, A. Lai, L. Belanger, S. Koesters, T. Pressler-Vydra, C. Holloman and C. Wills (2016). "Testing of a tethered personal health record framework for early end-of-life discussions." *Am J Manag Care* **22**(7): e258-263.
14. Bourgeois, F. C., J. Linder, S. A. Johnson, J. P. Co, J. Fiskio and T. G. Ferris (2010). "Impact of a computerized template on antibiotic prescribing for acute respiratory infections in children and adolescents." *Clin Pediatr (Phila)* **49**(10): 976-983.
15. Carroll, A. E., P. G. Biondich, V. Anand, T. M. Dugan, M. E. Sheley, S. Z. Xu and S. M. Downs (2011). "Targeted screening for pediatric conditions with the CHICA system." *J Am Med Inform Assoc* **18**(4): 485-490.
16. Chiche, L., A. Brescianini, J. Mancini, H. Servy and J. M. Durand (2012). "Evaluation of a prototype electronic personal health record for patients with idiopathic thrombocytopenic purpura." *Patient Prefer Adherence* **6**: 725-734.
17. Chien, A. T., S. Ganeshan, M. A. Schuster, L. S. Lehmann, L. A. Hatfield, K. E. Koplan, C. R. Petty, A. D. Sinaiko, T. D. Sequist and M. B. Rosenthal (2017). "The Effect of Price Information on the Ordering of Images and Procedures." *Pediatrics* **139**(2).
18. Chrischilles, E. A., J. P. Hourcade, W. Doucette, D. Eichmann, B. Gryzlak, R. Lorentzen, K. Wright, E. Letuchy, M. Mueller, K. Farris and B. Levy (2014). "Personal health records: a randomized trial of effects on elder medication safety." *J Am Med Inform Assoc* **21**(4): 679-686.
19. Cintron, A., R. Phillips and M. B. Hamel (2006). "The effect of a web-based, patient-directed intervention on knowledge, discussion, and completion of a health care proxy." *J Palliat Med* **9**(6): 1320-1328.
20. Co, J. P., S. A. Johnson, E. G. Poon, J. Fiskio, S. R. Rao, J. Van Cleave, J. M. Perrin and T. G. Ferris (2010). "Electronic health record decision support and quality of care for children with ADHD." *Pediatrics* **126**(2): 239-246.
21. Conroy, M. B., C. L. Bryce, K. M. McTigue, D. Tudorascu, B. B. Gibbs, D. Comer, R. Hess, K. Huber, L. R. Simkin-Silverman and G. S. Fischer (2017). "Promoting weight maintenance with electronic health record tools in a primary care setting: Baseline results from the MAINTAIN-pc trial." *Contemp Clin Trials* **54**: 60-67.



22. Curtis, L. M., R. J. Mullen, A. Russell, A. Fata, S. C. Bailey, G. Makoul and M. S. Wolf (2016). "An efficacy trial of an electronic health record-based strategy to inform patients on safe medication use: The role of written and spoken communication." *Patient Educ Couns* **99**(9): 1489-1495.
23. Dekarske, B. M., C. R. Zimmerman, R. Chang, P. J. Grant and B. W. Chaffee (2015). "Increased appropriateness of customized alert acknowledgement reasons for overridden medication alerts in a computerized provider order entry system." *Int J Med Inform* **84**(12): 1085-1093.
24. Del Fiol, G., P. J. Haug, J. J. Cimino, S. P. Narus, C. Norlin and J. A. Mitchell (2008). "Effectiveness of topic-specific infobuttons: a randomized controlled trial." *J Am Med Inform Assoc* **15**(6): 752-759.
25. Dexter, P. R., S. Perkins, J. M. Overhage, K. Maharry, R. B. Kohler and C. J. McDonald (2001). "A computerized reminder system to increase the use of preventive care for hospitalized patients." *N Engl J Med* **345**(13): 965-970.
26. Dischinger, H. R., E. Cheng, A. D. Mann, T. M. Grueber, S. Hawk, L. A. Davis, A. V. Prochazka, E. Hutt and L. Caplan (2015). "Decisional support to prevent adverse drug reactions of long latency: pilot randomized controlled intervention for glucocorticoid-induced diabetes." *J Eval Clin Pract* **21**(4): 614-619.
27. Dregan, A., T. P. van Staa, L. McDermott, G. McCann, M. Ashworth, J. Charlton, C. D. Wolfe, A. Rudd, L. Yardley and M. C. Gulliford (2014). "Point-of-care cluster randomized trial in stroke secondary prevention using electronic health records." *Stroke* **45**(7): 2066-2071.
28. Druss, B. G., X. Ji, G. Glick and S. A. von Esenwein (2014). "Randomized trial of an electronic personal health record for patients with serious mental illnesses." *Am J Psychiatry* **171**(3): 360-368.
29. Duke, J. D., X. Li and P. Dexter (2013). "Adherence to drug-drug interaction alerts in high-risk patients: a trial of context-enhanced alerting." *J Am Med Inform Assoc* **20**(3): 494-498.
30. Embi, P. J. and A. C. Leonard (2012). "Evaluating alert fatigue over time to EHR-based clinical trial alerts: findings from a randomized controlled study." *J Am Med Inform Assoc* **19**(e1): e145-148.
31. Federman, A. D., N. Kil, J. Kannry, E. Andreopolous, W. Toribio, J. Lyons, M. Singer, A. Yartel, B. D. Smith, D. B. Rein and K. Krauskopf (2017). "An Electronic Health Record-based Intervention to Promote Hepatitis C Virus Testing Among Adults Born Between 1945 and 1965: A Cluster-randomized Trial." *Med Care* **55**(6): 590-597.
32. Feldstein, A., P. J. Elmer, D. H. Smith, M. Herson, E. Orwoll, C. Chen, M. Aickin and M. C. Swain (2006). "Electronic medical record reminder improves osteoporosis management after a fracture: a randomized, controlled trial." *J Am Geriatr Soc* **54**(3): 450-457.
33. Feldstein, A. C., D. H. Smith, N. Perrin, X. Yang, M. Rix, M. A. Raebel, D. J. Magid, S. R. Simon and S. B. Soumerai (2006). "Improved therapeutic monitoring with several interventions: a randomized trial." *Arch Intern Med* **166**(17): 1848-1854.
34. Field, T. S., P. Rochon, M. Lee, L. Gavendo, J. L. Baril and J. H. Gurwitz (2009). "Computerized clinical decision support during medication ordering for long-term care residents with renal insufficiency." *J Am Med Inform Assoc* **16**(4): 480-485.
35. Fiks, A. G., K. F. Hunter, A. R. Localio, R. W. Grundmeier, T. Bryant-Stephens, A. A. Luberti, L. M. Bell and E. A. Alessandrini (2009). "Impact of electronic health record-based alerts on influenza vaccination for children with asthma." *Pediatrics* **124**(1): 159-169.
36. Fiks, A. G., S. L. Mayne, D. J. Karavite, A. Suh, R. O'Hara, A. R. Localio, M. Ross and R. W. Grundmeier (2015). "Parent-reported outcomes of a shared decision-making portal in asthma: a practice-based RCT." *Pediatrics* **135**(4): e965-973.
37. Forrest, C. B., A. G. Fiks, L. C. Bailey, R. Localio, R. W. Grundmeier, T. Richards, D. J. Karavite, L. Elden and E. A. Alessandrini (2013). "Improving adherence to otitis media guidelines with clinical decision support and physician feedback." *Pediatrics* **131**(4): e1071-1081.
38. Fortuna, R. J., F. Zhang, D. Ross-Degnan, F. X. Campion, J. A. Finkelstein, J. B. Kotch, A. C. Feldstein, D. H. Smith and S. R. Simon (2009). "Reducing the prescribing of heavily marketed medications: a randomized controlled trial." *J Gen Intern Med* **24**(8): 897-903.
39. Friction, J., D. B. Rindal, W. Rush, T. Flottesmesch, G. Vazquez, M. J. Thoele, E. Durand, C. Enstad and N. Rhodus (2011). "The effect of electronic health records on the use of clinical care guidelines for patients with medically complex conditions." *J Am Dent Assoc* **142**(10): 1133-1142.
40. Ghadieh, A. S., G. N. Hamadeh, D. M. Mahmassani and N. A. Lakkis (2015). "The effect of various types of patients' reminders on the uptake of pneumococcal vaccine in adults: A randomized controlled trial." *Vaccine* **33**(43): 5868-5872.
41. Gill, J. M., Y. X. Chen, J. J. Glutting, J. J. Diamond and M. I. Lieberman (2009). "Impact of decision support in electronic medical records on lipid management in primary care." *Popul Health Manag* **12**(5): 221-226.
42. Gill, J. M., A. G. Mainous, 3rd, R. J. Koopman, M. S. Player, C. J. Everett, Y. X. Chen, J. J. Diamond and M. I. Lieberman (2011). "Impact of EHR-based clinical decision support on adherence to guidelines for patients on NSAIDs: a randomized controlled trial." *Ann Fam Med* **9**(1): 22-30.
43. Gjelstad, S., S. Hoye, J. Straand, M. Brekke, I. Dalen and M. Lindbaek (2013). "Improving antibiotic prescribing in acute respiratory tract infections: cluster randomised trial from Norwegian general practice (prescription peer academic detailing (Rx-PAD) study)." *BMJ* **347**: f4403.
44. Goldberg, H. I., D. S. Lessler, K. Mertens, T. A. Eytan and A. D. Cheadle (2004). "Self-management support in a web-based medical record: a pilot randomized controlled trial." *Jt Comm J Qual Saf* **30**(11): 629-635, 589.

- 1
  - 2
  - 3
  - 4
  - 5
  - 6
  - 7
  - 8
  - 9
  - 10
  - 11
  - 12
  - 13
  - 14
  - 15
  - 16
  - 17
  - 18
  - 19
  - 20
  - 21
  - 22
  - 23
  - 24
  - 25
  - 26
  - 27
  - 28
  - 29
  - 30
  - 31
  - 32
  - 33
  - 34
  - 35
  - 36
  - 37
  - 38
  - 39
  - 40
  - 41
  - 42
  - 43
  - 44
  - 45
  - 46
  - 47
  - 48
  - 49
  - 50
  - 51
  - 52
  - 53
  - 54
  - 55
  - 56
  - 57
  - 58
  - 59
  - 60
45. Grant, R. W., J. S. Wald, J. L. Schnipper, T. K. Gandhi, E. G. Poon, E. J. Orav, D. H. Williams, L. A. Volk and B. Middleton (2008). "Practice-linked online personal health records for type 2 diabetes mellitus: a randomized controlled trial." *Arch Intern Med* **168**(16): 1776-1782.
46. Graumlich, J. F., H. Wang, A. Madison, M. S. Wolf, D. Kaiser, K. Dahal and D. G. Morrow (2016). "Effects of a Patient-Provider, Collaborative, Medication-Planning Tool: A Randomized, Controlled Trial." *J Diabetes Res* **2016**: 2129838.
47. Green, B. B., J. D. Ralston, P. A. Fishman, S. L. Catz, A. Cook, J. Carlson, L. Tyll, D. Carrell and R. S. Thompson (2008). "Electronic communications and home blood pressure monitoring (e-BP) study: design, delivery, and evaluation framework." *Contemp Clin Trials* **29**(3): 376-395.
48. Greenwood, D. A., S. A. Blozis, H. M. Young, T. S. Nesbitt and C. C. Quinn (2015). "Overcoming Clinical Inertia: A Randomized Clinical Trial of a Telehealth Remote Monitoring Intervention Using Paired Glucose Testing in Adults With Type 2 Diabetes." *J Med Internet Res* **17**(7): e178.
49. Gude, W. T., M. M. van Engen-Verheul, S. N. van der Veer, H. M. C. Kemps, M. W. M. Jaspers, N. F. de Keizer and N. Peek (2016). "Effect of a web-based audit and feedback intervention with outreach visits on the clinical performance of multidisciplinary teams: a cluster-randomized trial in cardiac rehabilitation." *Implementation Science : IS* **11**: 160.
50. Guiriguet, C., L. Munoz-Ortiz, A. Buron, I. Rivero, J. Grau, C. Vela-Vallespin, M. Vilarrubi, M. Torres, C. Hernandez, L. Mendez-Boo, P. Toran, L. Caballeria, F. Macia and A. Castells (2016). "Alerts in electronic medical records to promote a colorectal cancer screening programme: a cluster randomised controlled trial in primary care." *Br J Gen Pract* **66**(648): e483-490.
51. Gulliford, M. C., T. van Staa, A. Dregan, L. McDermott, G. McCann, M. Ashworth, J. Charlton, P. Little, M. V. Moore and L. Yardley (2014). "Electronic health records for intervention research: a cluster randomized trial to reduce antibiotic prescribing in primary care (eCRT study)." *Ann Fam Med* **12**(4): 344-351.
52. Gupta, A., P. Gholami, M. P. Turakhia, K. Friday and P. A. Heidenreich (2014). "Clinical reminders to providers of patients with reduced left ventricular ejection fraction increase defibrillator referral: a randomized trial." *Circ Heart Fail* **7**(1): 140-145.
53. Gurwitz, J. H., T. S. Field, J. Ogarek, J. Tjia, S. L. Cutrona, L. R. Harrold, S. J. Gagne, P. Preusse, J. L. Donovan, A. O. Kanaan, G. Reed and L. Garber (2014). "An electronic health record-based intervention to increase follow-up office visits and decrease rehospitalization in older adults." *J Am Geriatr Soc* **62**(5): 865-871.
54. Hannon, T. S., T. M. Dugan, C. K. Saha, S. J. McKee, S. M. Downs and A. E. Carroll (2017). "Effectiveness of Computer Automation for the Diagnosis and Management of Childhood Type 2 Diabetes: A Randomized Clinical Trial." *JAMA Pediatr* **171**(4): 327-334.
55. Hansagi, H., M. Olsson, A. Hussain and G. Ohlen (2008). "Is information sharing between the emergency department and primary care useful to the care of frequent emergency department users?" *Eur J Emerg Med* **15**(1): 34-39.
56. Herrett, E., E. Williamson, T. van Staa, M. Ranopa, C. Free, T. Chadborn, B. Goldacre and L. Smeeth (2016). "Text messaging reminders for influenza vaccine in primary care: a cluster randomised controlled trial (TXT4FLUJAB)." *BMJ Open* **6**(2): e010069.
57. Holbrook, A., K. Keshavjee, H. Lee, B. Bernstein, D. Chan, L. Thabane, H. Gerstein and S. Troyan (2005). "Individualized electronic decision support and reminders can improve diabetes care in the community." *AMIA Annu Symp Proc*: 982.
58. Holbrook, A., E. Pullenayegum, L. Thabane, S. Troyan, G. Foster, K. Keshavjee, D. Chan, L. Dolovich, H. Gerstein, C. Demers and G. Curnew (2011). "Shared electronic vascular risk decision support in primary care: Computerization of Medical Practices for the Enhancement of Therapeutic Effectiveness (COMPETE III) randomized trial." *Arch Intern Med* **171**(19): 1736-1744.
59. Holmes, J. F., J. Freilich, S. L. Taylor and D. Buettner (2015). "Electronic alerts for triage protocol compliance among emergency department triage nurses: a randomized controlled trial." *Nurs Res* **64**(3): 226-230.
60. Holt, T. A., M. Thorogood, F. Griffiths, S. Munday, T. Friede and D. Stables (2010). "Automated electronic reminders to facilitate primary cardiovascular disease prevention: randomised controlled trial." *Br J Gen Pract* **60**(573): e137-143.
61. Hooper, M. H., L. Weavind, A. P. Wheeler, J. B. Martin, S. S. Gowda, M. W. Semler, R. M. Hayes, D. W. Albert, N. B. Deane, H. Nian, J. L. Mathe, A. Nadas, J. Sztipanovits, A. Miller, G. R. Bernard and T. W. Rice (2012). "Randomized trial of automated, electronic monitoring to facilitate early detection of sepsis in the intensive care unit\*." *Crit Care Med* **40**(7): 2096-2101.
62. Hsu, L., C. L. Bowlus, S. L. Stewart, T. T. Nguyen, J. Dang, B. Chan and M. S. Chen, Jr. (2013). "Electronic messages increase hepatitis B screening in at-risk Asian American patients: a randomized, controlled trial." *Dig Dis Sci* **58**(3): 807-814.
63. Hu, X., X. Zhu and L. Gao (2014). "Intensive nursing care by an electronic followup system to promote secondary prevention after percutaneous coronary intervention: a randomized trial." *J Cardiopulm Rehabil Prev* **34**(6): 396-405.
64. Humphrey, L. L., J. Shannon, M. R. Partin, J. O'Malley, Z. Chen and M. Helfand (2011). "Improving the follow-up of positive hemocult screening tests: an electronic intervention." *J Gen Intern Med* **26**(7): 691-697.
65. Kashiwagi, K. and S. Tsukahara (2014). "Impact of patient access to Internet health records on glaucoma medication: randomized controlled trial." *J Med Internet Res* **16**(1): e15.

- 1
  - 2
  - 3
  - 4
  - 5
  - 6
  - 7
  - 8
  - 9
  - 10
  - 11
  - 12
  - 13
  - 14
  - 15
  - 16
  - 17
  - 18
  - 19
  - 20
  - 21
  - 22
  - 23
  - 24
  - 25
  - 26
  - 27
  - 28
  - 29
  - 30
  - 31
  - 32
  - 33
  - 34
  - 35
  - 36
  - 37
  - 38
  - 39
  - 40
  - 41
  - 42
  - 43
  - 44
  - 45
  - 46
  - 47
  - 48
  - 49
  - 50
  - 51
  - 52
  - 53
  - 54
  - 55
  - 56
  - 57
  - 58
  - 59
  - 60
66. Kilgore, M. L., R. Outman, J. L. Locher, J. J. Allison, A. Mudano, B. Kitchin, K. G. Saag and J. R. Curtis (2013). "Multimodal intervention to improve osteoporosis care in home health settings: results from a cluster randomized trial." *Osteoporos Int* **24**(10): 2555-2560.
67. Kortteisto, T., J. Raitanen, J. Komulainen, I. Kunnamo, M. Makela, P. Rissanen and M. Kaila (2014). "Patient-specific computer-based decision support in primary healthcare--a randomized trial." *Implement Sci* **9**: 15.
68. Krall, M. A., K. Traunweiser and W. Towery (2004). "Effectiveness of an electronic medical record clinical quality alert prepared by off-line data analysis." *Stud Health Technol Inform* **107**(Pt 1): 135-139.
69. Krist, A. H., S. H. Woolf, S. F. Rothemich, R. E. Johnson, J. E. Peele, T. D. Cunningham, D. R. Longo, G. A. Bello and G. R. Matzke (2012). "Interactive preventive health record to enhance delivery of recommended care: a randomized trial." *Ann Fam Med* **10**(4): 312-319.
70. Kucher, N., S. Koo, R. Quiroz, J. M. Cooper, M. D. Paterno, B. Soukonnikov and S. Z. Goldhaber (2005). "Electronic alerts to prevent venous thromboembolism among hospitalized patients." *N Engl J Med* **352**(10): 969-977.
71. Kuilboer, M. M., M. A. van Wijk, M. Mosseveld, E. van der Does, J. C. de Jongste, S. E. Overbeek, B. Ponsioen and J. van der Lei (2006). "Computed critiquing integrated into daily clinical practice affects physicians' behavior--a randomized clinical trial with AsthmaCritic." *Methods Inf Med* **45**(4): 447-454.
72. Lang, E., M. Afilalo, A. C. Vandal, J. F. Boivin, X. Xue, A. Colacone, R. Leger, I. Shrier and S. Rosenthal (2006). "Impact of an electronic link between the emergency department and family physicians: a randomized controlled trial." *CMAJ* **174**(3): 313-318.
73. Lau, A. Y., A. Arguel, S. Dennis, S. T. Liaw and E. Coiera (2015). ""Why Didn't it Work?" Lessons From a Randomized Controlled Trial of a Web-based Personally Controlled Health Management System for Adults with Asthma." *J Med Internet Res* **17**(12): e283.
74. Lau, A. Y., V. Sintchenko, J. Crimmins, F. Magrabi, B. Gallego and E. Coiera (2012). "Impact of a web-based personally controlled health management system on influenza vaccination and health services utilization rates: a randomized controlled trial." *J Am Med Inform Assoc* **19**(5): 719-727.
75. Lester, W. T., R. W. Grant, G. O. Barnett and H. C. Chueh (2006). "Randomized controlled trial of an informatics-based intervention to increase statin prescription for secondary prevention of coronary disease." *J Gen Intern Med* **21**(1): 22-29.
76. Lin, C. J., M. P. Nowalk, V. N. Pavlik, A. E. Brown, S. Zhang, J. M. Raviotta, K. K. Moehling, M. Hawk, E. M. Ricci, D. B. Middleton, S. Patel, J. E. South-Paul and R. K. Zimmerman (2016). "Using the 4 pillars practice transformation program to increase adult influenza vaccination and reduce missed opportunities in a randomized cluster trial." *BMC Infect Dis* **16**(1): 623.
77. Lin, Y. F., L. H. Sheng, M. Y. Wu, C. M. Zheng, T. J. Chang, Y. C. Li, Y. H. Huang and H. P. Lu (2014). "A study of renal function influence by integrating cloud-based manometers and physician order entry systems." *J Chin Med Assoc* **77**(12): 642-647.
78. Linder, J. A., N. A. Rigotti, L. I. Schneider, J. H. Kelley, P. Brawarsky and J. S. Haas (2009). "An electronic health record-based intervention to improve tobacco treatment in primary care: a cluster-randomized controlled trial." *Arch Intern Med* **169**(8): 781-787.
79. Linder, J. A., J. L. Schnipper, R. Tsurikova, D. T. Yu, L. A. Volk, A. J. Melnikas, M. B. Palchuk, M. Olsha-Yehiav and B. Middleton (2010). "Electronic health record feedback to improve antibiotic prescribing for acute respiratory infections." *Am J Manag Care* **16**(12 Suppl HIT): e311-319.
80. Linder, J. A., J. L. Schnipper, R. Tsurikova, T. Yu, L. A. Volk, A. J. Melnikas, M. B. Palchuk, M. Olsha-Yehiav and B. Middleton (2009). "Documentation-based clinical decision support to improve antibiotic prescribing for acute respiratory infections in primary care: a cluster randomised controlled trial." *Inform Prim Care* **17**(4): 231-240.
81. Lo, H. G., M. E. Matheny, D. L. Seger, D. W. Bates and T. K. Gandhi (2009). "Impact of non-interruptive medication laboratory monitoring alerts in ambulatory care." *J Am Med Inform Assoc* **16**(1): 66-71.
82. Loo, T. S., R. B. Davis, L. A. Lipsitz, J. Irish, C. K. Bates, K. Agarwal, L. Markson and M. B. Hamel (2011). "Electronic medical record reminders and panel management to improve primary care of elderly patients." *Arch Intern Med* **171**(17): 1552-1558.
83. Maddocks, H., M. Stewart, A. Thind, A. L. Terry, V. Chevendra, J. N. Marshall, L. B. Denomme and S. Cejic (2011). "Feedback and training tool to improve provision of preventive care by physicians using EMRs: a randomised control trial." *Inform Prim Care* **19**(3): 147-153.
84. Matheny, M. E., T. K. Gandhi, E. J. Orav, Z. Ladak-Merchant, D. W. Bates, G. J. Kuperman and E. G. Poon (2007). "Impact of an automated test results management system on patients' satisfaction about test result communication." *Arch Intern Med* **167**(20): 2233-2239.
85. Matheny, M. E., T. D. Sequist, A. C. Seger, J. M. Fiskio, M. Sperling, D. Bugbee, D. W. Bates and T. K. Gandhi (2008). "A randomized trial of electronic clinical reminders to improve medication laboratory monitoring." *J Am Med Inform Assoc* **15**(4): 424-429.
86. Matthews, D. E., S. J. Beatty, G. M. Grever, A. Lehman and K. D. Barnes (2016). "Comparison of 2 Population Health Management Approaches to Increase Vitamin B12 Monitoring in Patients Taking Metformin." *Ann Pharmacother* **50**(10): 840-846.
87. Mayne, S. L., N. E. duRivage, K. A. Feemster, A. R. Localio, R. W. Grundmeier and A. G. Fiks (2014). "Effect of decision support on missed opportunities for human papillomavirus vaccination." *Am J Prev Med* **47**(6): 734-744.

- 1
  - 2
  - 3
  - 4
  - 5
  - 6
  - 7
  - 8
  - 9
  - 10
  - 11
  - 12
  - 13
  - 14
  - 15
  - 16
  - 17
  - 18
  - 19
  - 20
  - 21
  - 22
  - 23
  - 24
  - 25
  - 26
  - 27
  - 28
  - 29
  - 30
  - 31
  - 32
  - 33
  - 34
  - 35
  - 36
  - 37
  - 38
  - 39
  - 40
  - 41
  - 42
  - 43
  - 44
  - 45
  - 46
  - 47
  - 48
  - 49
  - 50
  - 51
  - 52
  - 53
  - 54
  - 55
  - 56
  - 57
  - 58
  - 59
  - 60
88. McCarrier, K. P., J. D. Ralston, I. B. Hirsch, G. Lewis, D. P. Martin, F. J. Zimmerman and H. I. Goldberg (2009). "Web-based collaborative care for type 1 diabetes: a pilot randomized trial." *Diabetes Technol Ther* **11**(4): 211-217.
89. McGinn, T. G., L. McCullagh, J. Kannry, M. Knaus, A. Sofianou, J. P. Wisnivesky and D. M. Mann (2013). "Efficacy of an evidence-based clinical decision support in primary care practices: a randomized clinical trial." *JAMA Intern Med* **173**(17): 1584-1591.
90. Meeker, D., J. A. Linder, C. R. Fox, M. W. Friedberg, S. D. Persell, N. J. Goldstein, T. K. Knight, J. W. Hay and J. N. Doctor (2016). "Effect of Behavioral Interventions on Inappropriate Antibiotic Prescribing Among Primary Care Practices: A Randomized Clinical Trial." *JAMA* **315**(6): 562-570.
91. Mertens, J. R., F. W. Chi, C. M. Weisner, D. D. Satre, T. B. Ross, S. Allen, D. Pating, C. I. Campbell, Y. W. Lu and S. A. Sterling (2015). "Physician versus non-physician delivery of alcohol screening, brief intervention and referral to treatment in adult primary care: the ADVISE cluster randomized controlled implementation trial." *Addict Sci Clin Pract* **10**: 26.
92. Meystre, S. M. and P. J. Haug (2008). "Randomized controlled trial of an automated problem list with improved sensitivity." *Int J Med Inform* **77**(9): 602-612.
93. Mitchell, E., F. Sullivan, J. M. Grimshaw, P. T. Donnan and G. Watt (2005). "Improving management of hypertension in general practice: a randomised controlled trial of feedback derived from electronic patient data." *Br J Gen Pract* **55**(511): 94-101.
94. Muller, D., J. Logan, D. Dorr and D. Mosen (2009). "The effectiveness of a secure email reminder system for colorectal cancer screening." *AMIA Annu Symp Proc* **2009**: 457-461.
95. Munck, L. K., K. R. Hansen, A. G. Molbak, H. Balle and S. Kongsgren (2014). "The use of shared medication record as part of medication reconciliation at hospital admission is feasible." *Dan Med J* **61**(5): A4817.
96. Murphy, D. R., L. Wu, E. J. Thomas, S. N. Forjuoh, A. N. Meyer and H. Singh (2015). "Electronic Trigger-Based Intervention to Reduce Delays in Diagnostic Evaluation for Cancer: A Cluster Randomized Controlled Trial." *J Clin Oncol* **33**(31): 3560-3567.
97. Murray, M. D., L. E. Harris, J. M. Overhage, X. H. Zhou, G. J. Eckert, F. E. Smith, N. N. Buchanan, F. D. Wolinsky, C. J. McDonald and W. M. Tierney (2004). "Failure of computerized treatment suggestions to improve health outcomes of outpatients with uncomplicated hypertension: results of a randomized controlled trial." *Pharmacotherapy* **24**(3): 324-337.
98. Nagykaldi, Z., C. B. Aspy, A. Chou and J. W. Mold (2012). "Impact of a Wellness Portal on the delivery of patient-centered preventive care." *J Am Board Fam Med* **25**(2): 158-167.
99. Nahm, E. S., C. Diblasi, E. Gonzales, K. Silver, S. Zhu, K. Sagherian and K. Kongs (2017). "Patient-Centered Personal Health Record and Portal Implementation Toolkit for Ambulatory Clinics: A Feasibility Study." *Comput Inform Nurs* **35**(4): 176-185.
100. Noel, H. C., D. C. Vogel, J. J. Erdos, D. Cornwall and F. Levin (2004). "Home telehealth reduces healthcare costs." *Telemed J E Health* **10**(2): 170-183.
101. O'Connor, P. J., D. J. Magid, J. M. Sperl-Hillen, D. W. Price, S. E. Asche, W. A. Rush, H. L. Ekstrom, D. W. Brand, H. M. Tavel, O. V. Godlevsky, P. E. Johnson and K. L. Margolis (2014). "Personalised physician learning intervention to improve hypertension and lipid control: randomised trial comparing two methods of physician profiling." *BMJ Qual Saf* **23**(12): 1014-1022.
102. O'Connor, P. J., J. M. Sperl-Hillen, W. A. Rush, P. E. Johnson, G. H. Amundson, S. E. Asche, H. L. Ekstrom and T. P. Gilmer (2011). "Impact of electronic health record clinical decision support on diabetes care: a randomized trial." *Ann Fam Med* **9**(1): 12-21.
103. Otsuka, S. H., N. H. Tayal, K. Porter, P. J. Embi and S. J. Beatty (2013). "Improving herpes zoster vaccination rates through use of a clinical pharmacist and a personal health record." *Am J Med* **126**(9): 832 e831-836.
104. Overhage, J. M., P. R. Dexter, S. M. Perkins, W. H. Cordell, J. McGoff, R. McGrath and C. J. McDonald (2002). "A randomized, controlled trial of clinical information shared from another institution." *Ann Emerg Med* **39**(1): 14-23.
105. Palen, T. E., D. W. Price, A. J. Snyder and S. M. Shetterly (2010). "Computerized alert reduced D-dimer testing in the elderly." *Am J Manag Care* **16**(11): e267-275.
106. Palen, T. E., M. Raebel, E. Lyons and D. M. Magid (2006). "Evaluation of laboratory monitoring alerts within a computerized physician order entry system for medication orders." *Am J Manag Care* **12**(7): 389-395.
107. Persell, S. D., D. M. Lloyd-Jones, E. M. Friesema, A. J. Cooper and D. W. Baker (2013). "Electronic health record-based patient identification and individualized mailed outreach for primary cardiovascular disease prevention: a cluster randomized trial." *J Gen Intern Med* **28**(4): 554-560.
108. Peterson, J. F., B. P. Rosenbaum, L. R. Waitman, R. Habermann, J. Powers, D. Harrell and R. A. Miller (2007). "Physicians' response to guided geriatric dosing: initial results from a randomized trial." *Stud Health Technol Inform* **129**(Pt 2): 1037-1040.
109. Player, M. S., J. M. Gill, A. G. Mainous, 3rd, C. J. Everett, R. J. Koopman, J. J. Diamond, M. I. Lieberman and Y. X. Chen (2010). "An electronic medical record-based intervention to improve quality of care for gastroesophageal reflux disease (GERD) and atypical presentations of GERD." *Qual Prim Care* **18**(4): 223-229.
110. Price, M., I. Davies, R. Rusk, M. Lesperance and J. Weber (2017). "Applying STOPP Guidelines in Primary Care Through Electronic Medical Record Decision Support: Randomized Control Trial Highlighting the Importance of Data Quality." *JMIR Med Inform* **5**(2): e15.
111. Proeschold-Bell, R. J., C. M. Belden, H. Parnell, S. Cohen, M. Cromwell and F. Lombard (2010). "A randomized controlled trial of health information exchange between human immunodeficiency virus institutions." *J Public Health Manag Pract* **16**(6): 521-528.



112. Raebel, M. A., N. M. Carroll, J. A. Kelleher, E. A. Chester, S. Berga and D. J. Magid (2007). "Randomized trial to improve prescribing safety during pregnancy." *J Am Med Inform Assoc* **14**(4): 440-450.
113. Raebel, M. A., J. Charles, J. Dugan, N. M. Carroll, E. J. Korner, D. W. Brand and D. J. Magid (2007). "Randomized trial to improve prescribing safety in ambulatory elderly patients." *J Am Geriatr Soc* **55**(7): 977-985.
114. Ralston, J. D., I. B. Hirsch, J. Hoath, M. Mullen, A. Cheadle and H. I. Goldberg (2009). "Web-based collaborative care for type 2 diabetes: a pilot randomized trial." *Diabetes Care* **32**(2): 234-239.
115. Rathlev, N., R. Almomen, A. Deutsch, H. Smithline, H. Li and P. Visintainer (2016). "Randomized Controlled Trial of Electronic Care Plan Alerts and Resource Utilization by High Frequency Emergency Department Users with Opioid Use Disorder." *West J Emerg Med* **17**(1): 28-34.
116. Rollman, B. L., B. H. Hanusa, T. Gilbert, H. J. Lowe, W. N. Kapoor and H. C. Schulberg (2001). "The electronic medical record. A randomized trial of its impact on primary care physicians' initial management of major depression [corrected]." *Arch Intern Med* **161**(2): 189-197.
117. Rood, E., R. J. Bosman, J. I. van der Spoel, P. Taylor and D. F. Zandstra (2005). "Use of a computerized guideline for glucose regulation in the intensive care unit improved both guideline adherence and glucose regulation." *J Am Med Inform Assoc* **12**(2): 172-180.
118. Ross, S. E., L. A. Moore, M. A. Earnest, L. Wittevrongel and C. T. Lin (2004). "Providing a web-based online medical record with electronic communication capabilities to patients with congestive heart failure: randomized trial." *J Med Internet Res* **6**(2): e12.
119. Rothschild, J. M., S. McGurk, M. Honour, L. Lu, A. A. McClendon, P. Srivastava, W. H. Churchill, R. M. Kaufman, J. Avorn, E. F. Cook and D. W. Bates (2007). "Assessment of education and computerized decision support interventions for improving transfusion practice." *Transfusion* **47**(2): 228-239.
120. Ryan, A. M., C. M. McCullough, S. C. Shih, J. J. Wang, M. S. Ryan and L. P. Casalino (2014). "The intended and unintended consequences of quality improvement interventions for small practices in a community-based electronic health record implementation project." *Med Care* **52**(9): 826-832.
121. Schnipper, J. L., T. K. Gandhi, J. S. Wald, R. W. Grant, E. G. Poon, L. A. Volk, A. Businger, D. H. Williams, E. Siteman, L. Buckel and B. Middleton (2012). "Effects of an online personal health record on medication accuracy and safety: a cluster-randomized trial." *J Am Med Inform Assoc* **19**(5): 728-734.
122. Schnipper, J. L., C. Hamann, C. D. Ndumele, C. L. Liang, M. G. Carty, A. S. Karson, I. Bhan, C. M. Coley, E. Poon, A. Turchin, S. A. Labonville, E. K. Diedrichsen, S. Lipsitz, C. A. Broverman, P. McCarthy and T. K. Gandhi (2009). "Effect of an electronic medication reconciliation application and process redesign on potential adverse drug events: a cluster-randomized trial." *Arch Intern Med* **169**(8): 771-780.
123. Schnipper, J. L., C. L. Liang, C. D. Ndumele and M. L. Pendergrass (2010). "Effects of a computerized order set on the inpatient management of hyperglycemia: a cluster-randomized controlled trial." *Endocr Pract* **16**(2): 209-218.
124. Schnipper, J. L., J. A. Linder, M. B. Palchuk, D. T. Yu, K. E. McColgan, L. A. Volk, R. Tsurikova, A. J. Melnikas, J. S. Einbinder and B. Middleton (2010). "Effects of documentation-based decision support on chronic disease management." *Am J Manag Care* **16**(12 Suppl HIT): SP72-81.
125. Schriefer, S. P., S. E. Landis, D. J. Turbow and S. C. Patch (2009). "Effect of a computerized body mass index prompt on diagnosis and treatment of adult obesity." *Fam Med* **41**(7): 502-507.
126. Sedrak, M. S., J. S. Myers, D. S. Small, I. Nachamkin, J. B. Ziemba, D. Murray, G. W. Kurtzman, J. Zhu, W. Wang, D. Mincarelli, D. Danoski, B. P. Wells, J. S. Berns, P. J. Brennan, C. W. Hanson, C. J. Dine and M. S. Patel (2017). "Effect of a Price Transparency Intervention in the Electronic Health Record on Clinician Ordering of Inpatient Laboratory Tests: The PRICE Randomized Clinical Trial." *JAMA Intern Med* **177**(7): 939-945.
127. Sequist, T. D., T. K. Gandhi, A. S. Karson, J. M. Fiskio, D. Bugbee, M. Sperling, E. F. Cook, E. J. Orav, D. G. Fairchild and D. W. Bates (2005). "A randomized trial of electronic clinical reminders to improve quality of care for diabetes and coronary artery disease." *J Am Med Inform Assoc* **12**(4): 431-437.
128. Sequist, T. D., A. M. Zaslavsky, G. A. Colditz and J. Z. Ayanian (2011). "Electronic patient messages to promote colorectal cancer screening: a randomized controlled trial." *Arch Intern Med* **171**(7): 636-641.
129. Smith, J. R., M. J. Noble, S. Musgrave, J. Murdoch, G. M. Price, G. R. Barton, J. Windley, R. Holland, B. D. Harrison, A. Howe, D. B. Price, I. Harvey and A. M. Wilson (2012). "The at-risk registers in severe asthma (ARRISA) study: a cluster-randomised controlled trial examining effectiveness and costs in primary care." *Thorax* **67**(12): 1052-1060.
130. Steventon, A., M. Bardsley, H. Doll, E. Tuckey and S. P. Newman (2014). "Effect of telehealth on glycaemic control: analysis of patients with type 2 diabetes in the Whole Systems Demonstrator cluster randomised trial." *BMC Health Serv Res* **14**: 334.
131. Stockwell, M. S., M. Catalozzi, S. Camargo, R. Ramakrishnan, S. Holleran, S. E. Findley, R. Kukafka, A. M. Hofstetter, N. Fernandez and D. K. Vawdrey (2015). "Registry-linked electronic influenza vaccine provider reminders: a cluster-crossover trial." *Pediatrics* **135**(1): e75-82.
132. Stockwell, M. S., E. O. Kharbanda, R. A. Martinez, C. Y. Vargas, D. K. Vawdrey and S. Camargo (2012). "Effect of a text messaging intervention on influenza vaccination in an urban, low-income pediatric and adolescent population: a randomized controlled trial." *JAMA* **307**(16): 1702-1708.
133. Strom, B. L., R. Schinnar, F. Aberra, W. Bilker, S. Hennessy, C. E. Leonard and E. Pifer (2010). "Unintended effects of a computerized physician order entry nearly hard-stop alert to prevent a drug interaction: a randomized controlled trial." *Arch Intern Med* **170**(17): 1578-1583.
134. Strom, B. L., R. Schinnar, W. Bilker, S. Hennessy, C. E. Leonard and E. Pifer (2010). "Randomized clinical trial of a customized electronic alert requiring an affirmative response compared to a control group

- receiving a commercial passive CPOE alert: NSAID--warfarin co-prescribing as a test case." *J Am Med Inform Assoc* **17**(4): 411-415.
135. Subramanian, U., S. D. Fihn, M. Weinberger, L. Plue, F. E. Smith, E. M. Udris, M. B. McDonell, G. J. Eckert, M. Temkit, X. H. Zhou, L. Chen and W. M. Tierney (2004). "A controlled trial of including symptom data in computer-based care suggestions for managing patients with chronic heart failure." *Am J Med* **116**(6): 375-384.
  136. Szilagyi, P. G., J. R. Serwint, S. G. Humiston, C. M. Rand, S. Schaffer, P. Vincelli, N. Dhepyasuwan, A. Blumkin, C. Albertin and C. R. Curtis (2015). "Effect of provider prompts on adolescent immunization rates: a randomized trial." *Acad Pediatr* **15**(2): 149-157.
  137. Tamblyn, R., T. Eguale, D. L. Buckeridge, A. Huang, J. Hanley, K. Reidel, S. Shi and N. Winslade (2012). "The effectiveness of a new generation of computerized drug alerts in reducing the risk of injury from drug side effects: a cluster randomized trial." *J Am Med Inform Assoc* **19**(4): 635-643.
  138. Tamblyn, R., P. Ernst, N. Winslade, A. Huang, R. Grad, R. W. Platt, S. Ahmed, T. Moraga and T. Eguale (2015). "Evaluating the impact of an integrated computer-based decision support with person-centered analytics for the management of asthma in primary care: a randomized controlled trial." *J Am Med Inform Assoc* **22**(4): 773-783.
  139. Tamblyn, R., A. Huang, L. Taylor, Y. Kawasumi, G. Bartlett, R. Grad, A. Jacques, M. Dawes, M. Abrahamowicz, R. Perreault, N. Winslade, L. Poissant and A. Pinsonneault (2008). "A randomized trial of the effectiveness of on-demand versus computer-triggered drug decision support in primary care." *J Am Med Inform Assoc* **15**(4): 430-438.
  140. Tamblyn, R., K. Reidel, A. Huang, L. Taylor, N. Winslade, G. Bartlett, R. Grad, A. Jacques, M. Dawes, P. Laroche and A. Pinsonneault (2010). "Increasing the detection and response to adherence problems with cardiovascular medication in primary care through computerized drug management systems: a randomized controlled trial." *Med Decis Making* **30**(2): 176-188.
  141. Tang, J. W., R. F. Kushner, K. A. Cameron, B. Hicks, A. J. Cooper and D. W. Baker (2012). "Electronic tools to assist with identification and counseling for overweight patients: a randomized controlled trial." *J Gen Intern Med* **27**(8): 933-939.
  142. Tang, P. C., J. M. Overhage, A. S. Chan, N. L. Brown, B. Aghighi, M. P. Entwistle, S. L. Hui, S. M. Hyde, L. H. Klieman, C. J. Mitchell, A. J. Perkins, L. S. Qureshi, T. A. Waltmyer, L. J. Winters and C. Y. Young (2013). "Online disease management of diabetes: engaging and motivating patients online with enhanced resources-diabetes (EMPOWER-D), a randomized controlled trial." *J Am Med Inform Assoc* **20**(3): 526-534.
  143. Terrell, K. M., A. J. Perkins, S. L. Hui, C. M. Callahan, P. R. Dexter and D. K. Miller (2010). "Computerized decision support for medication dosing in renal insufficiency: a randomized, controlled trial." *Ann Emerg Med* **56**(6): 623-629.
  144. Tierney, W. M., J. M. Overhage, M. D. Murray, L. E. Harris, X. H. Zhou, G. J. Eckert, F. E. Smith, N. Nienaber, C. J. McDonald and F. D. Wolinsky (2003). "Effects of computerized guidelines for managing heart disease in primary care." *J Gen Intern Med* **18**(12): 967-976.
  145. Tornvall, E., L. K. Wahren and S. Wilhelmsson (2009). "Advancing nursing documentation--an intervention study using patients with leg ulcer as an example." *Int J Med Inform* **78**(9): 605-617.
  146. Toth-Pal, E., G. H. Nilsson and A. K. Furhoff (2004). "Clinical effect of computer generated physician reminders in health screening in primary health care--a controlled clinical trial of preventive services among the elderly." *Int J Med Inform* **73**(9-10): 695-703.
  147. Touchette, D. R., S. Rao, P. K. Dhru, W. Zhao, Y. K. Choi, I. Bhandari and G. D. Stettin (2012). "Identification of and intervention to address therapeutic gaps in care." *Am J Manag Care* **18**(10): e364-371.
  148. Valenza, J. A., D. Taylor, M. F. Walji and C. W. Johnson (2014). "Assessing the benefit of a personalized EHR-generated informed consent in a dental school setting." *J Dent Educ* **78**(8): 1182-1193.
  149. van Engen-Verheul, M. M., N. F. de Keizer, S. N. van der Veer, H. M. Kemps, W. J. Scholte op Reimer, M. W. Jaspers and N. Peek (2014). "Evaluating the effect of a web-based quality improvement system with feedback and outreach visits on guideline concordance in the field of cardiac rehabilitation: rationale and study protocol." *Implement Sci* **9**: 780.
  150. van Wyk, J. T., M. A. van Wijk, M. C. Sturkenboom, M. Mosseveld, P. W. Moorman and J. van der Lei (2008). "Electronic alerts versus on-demand decision support to improve dyslipidemia treatment: a cluster randomized controlled trial." *Circulation* **117**(3): 371-378.
  151. Vidrine, J. I., S. Shete, Y. Cao, A. Greisinger, P. Harmonson, B. Sharp, L. Miles, S. M. Zbikowski and D. W. Wetter (2013). "Ask-Advise-Connect: a new approach to smoking treatment delivery in health care settings." *JAMA Intern Med* **173**(6): 458-464.
  152. Vollmer, W. M., A. A. Owen-Smith, J. O. Tom, R. Laws, D. G. Ditmer, D. H. Smith, A. C. Waterbury, J. L. Schneider, C. H. Yonehara, A. Williams, S. Vupputuri and C. S. Rand (2014). "Improving adherence to cardiovascular disease medications with information technology." *Am J Manag Care* **20**(11 Spec No. 17): SP502-510.
  153. Vrijens, B., A. Belmans, K. Matthys, E. de Klerk and E. Lesaffre (2006). "Effect of intervention through a pharmaceutical care program on patient adherence with prescribed once-daily atorvastatin." *Pharmacoepidemiol Drug Saf* **15**(2): 115-121.
  154. Wack, M., E. Puymirat, B. Ranque, S. Georgin-Lavialle, I. Pierre, A. Tanguy, F. Ackermann, C. Mallet, J. Pavie, H. Boultache, P. Durieux and P. Avillach (2015). "Evaluating the Impact of Computerized Provider Order

- 1  
2  
3 Entry on Medical Students Training at Bedside: A Randomized Controlled Trial." *PLoS One* **10**(9):  
4 e0138094.
- 5 155. Wagner, P. J., J. Dias, S. Howard, K. W. Kintziger, M. F. Hudson, Y. H. Seol and P. Sodomka (2012). "Personal  
6 health records and hypertension control: a randomized trial." *J Am Med Inform Assoc* **19**(4): 626-634.
- 7 156. Wald, H. L., B. Bandle, A. A. Richard, S. J. Min and E. Capezuti (2014). "A Trial of electronic surveillance  
8 feedback for quality improvement at Nurses Improving Care for Healthsystem Elders (NICHE) hospitals." *Am J Infect Control* **42**(10 Suppl): S250-256.
- 9 157. Walker, J., C. K. Fairley, S. M. Walker, L. C. Gurrin, J. M. Gunn, M. V. Pirota, R. Carter and J. S. Hocking (2010).  
10 "Computer reminders for Chlamydia screening in general practice: a randomized controlled trial." *Sex*  
11 *Transm Dis* **37**(7): 445-450.
- 12 158. Wang, L., L. He, Y. Tao, L. Sun, H. Zheng, Y. Zheng, Y. Shen, S. Liu, Y. Zhao and Y. Wang (2017). "Evaluating  
13 a Web-Based Coaching Program Using Electronic Health Records for Patients With Chronic Obstructive  
14 Pulmonary Disease in China: Randomized Controlled Trial." *J Med Internet Res* **19**(7): e264.
- 15 159. Weber, V., A. White and R. McIlvried (2008). "An electronic medical record (EMR)-based intervention to  
16 reduce polypharmacy and falls in an ambulatory rural elderly population." *J Gen Intern Med* **23**(4): 399-  
17 404.
- 18 160. Weingart, S. N., A. Carbo, A. Tess, L. Chiappetta, S. Tutkus, L. Morway, M. Toth, R. B. Davis, R. S. Phillips and  
19 D. W. Bates (2013). "Using a patient internet portal to prevent adverse drug events: a randomized,  
20 controlled trial." *J Patient Saf* **9**(3): 169-175.
- 21 161. Weiss, C. H., D. Dibardino, J. Rho, N. Sung, B. Collander and R. G. Wunderink (2013). "A clinical trial  
22 comparing physician prompting with an unprompted automated electronic checklist to reduce empirical  
23 antibiotic utilization." *Crit Care Med* **41**(11): 2563-2569.
- 24 162. Were, M. C., C. Shen, W. M. Tierney, J. J. Mamlin, P. G. Biondich, X. Li, S. Kimaiyo and B. W. Mamlin (2011).  
25 "Evaluation of computer-generated reminders to improve CD4 laboratory monitoring in sub-Saharan  
26 Africa: a prospective comparative study." *J Am Med Inform Assoc* **18**(2): 150-155.
- 27 163. Whited, J. D., R. P. Hall, M. E. Foy, L. E. Marbrey, S. C. Grambow, T. K. Dudley, S. Datta, D. L. Simel and E. Z.  
28 Oddone (2002). "Teledermatology's impact on time to intervention among referrals to a dermatology  
29 consult service." *Telemed J E Health* **8**(3): 313-321.
- 30 164. Williams, L. K., E. L. Peterson, K. Wells, J. Campbell, M. Wang, V. K. Chowdhry, M. Walsh, R. Enberg, D. E.  
31 Lanfear and M. Pladevall (2010). "A cluster-randomized trial to provide clinicians inhaled corticosteroid  
32 adherence information for their patients with asthma." *J Allergy Clin Immunol* **126**(2): 225-231, 231  
33 e221-224.
- 34 165. Wilson, F. P., M. Shashaty, J. Testani, I. Aqeel, Y. Borovskiy, S. S. Ellenberg, H. I. Feldman, H. Fernandez, Y.  
35 Gitelman, J. Lin, D. Negoianu, C. R. Parikh, P. P. Reese, R. Urbani and B. Fuchs (2015). "Automated,  
36 electronic alerts for acute kidney injury: a single-blind, parallel-group, randomised controlled trial." *Lancet* **385**(9981): 1966-1974.
- 37 166. Wood, J. and J. Finkelstein (2013). "Comparison of automated and manual vital sign collection at hospital  
38 wards." *Stud Health Technol Inform* **190**: 48-50.
- 39 167. Wright, A., J. Pang, J. C. Feblowitz, F. L. Maloney, A. R. Wilcox, K. S. McLoughlin, H. Ramelson, L. Schneider  
40 and D. W. Bates (2012). "Improving completeness of electronic problem lists through clinical decision  
41 support: a randomized, controlled trial." *J Am Med Inform Assoc* **19**(4): 555-561.
- 42 168. Wright, A., E. G. Poon, J. Wald, J. Feblowitz, J. E. Pang, J. L. Schnipper, R. W. Grant, T. K. Gandhi, L. A. Volk,  
43 A. Bloom, D. H. Williams, K. Gardner, M. Epstein, L. Nelson, A. Businger, Q. Li, D. W. Bates and B. Middleton  
44 (2012). "Randomized controlled trial of health maintenance reminders provided directly to patients  
45 through an electronic PHR." *J Gen Intern Med* **27**(1): 85-92.
- 46 169. Wright, A., E. G. Poon, J. Wald, J. L. Schnipper, R. Grant, T. K. Gandhi, L. A. Volk, A. Bloom, D. H. Williams, K.  
47 Gardner, M. Epstein, L. Nelson, A. Businger, Q. Li, D. W. Bates and B. Middleton (2008). "Effectiveness of  
48 health maintenance reminders provided directly to patients." *AMIA Annu Symp Proc*: 1183.
- 49 170. Yi, S. S., B. P. Tabaei, S. Y. Angell, A. Rapin, M. D. Buck, W. G. Pagano, F. J. Maselli, A. Simmons and S. Chamany  
50 (2015). "Self-blood pressure monitoring in an urban, ethnically diverse population: a randomized clinical  
51 trial utilizing the electronic health record." *Circ Cardiovasc Qual Outcomes* **8**(2): 138-145.
- 52 171. Zeiger, R. S., M. Schatz, Q. Li, P. G. Solari, J. L. Zazzali and W. Chen (2014). "Real-time asthma outreach  
53 reduces excessive short-acting beta2-agonist use: a randomized study." *J Allergy Clin Immunol Pract* **2**(4):  
54 445-456, 456 e441-445.
- 55 172. Zera, C. A., D. W. Bates, A. M. Stuebe, J. L. Ecker and E. W. Seely (2015). "Diabetes Screening Reminder for  
56 Women With Prior Gestational Diabetes: A Randomized Controlled Trial." *Obstet Gynecol* **126**(1): 109-  
57 114



### Appendix 4: Risk of Bias assessment

|                                                                                                                                                                                                                                                                                                                                                                                                                                                  | Random sequence generation | Allocation concealment | Blinding of participants and personnel | Blinding of outcome assessment | Incomplete outcome data (>10%) | Selective outcome reporting <sup>2</sup> |
|--------------------------------------------------------------------------------------------------------------------------------------------------------------------------------------------------------------------------------------------------------------------------------------------------------------------------------------------------------------------------------------------------------------------------------------------------|----------------------------|------------------------|----------------------------------------|--------------------------------|--------------------------------|------------------------------------------|
| Bereznicki, Peterson, et al.                                                                                                                                                                                                                                                                                                                                                                                                                     | ?                          | -                      | -                                      | -                              | ?                              | n/a                                      |
| Corson, Doak, et al.                                                                                                                                                                                                                                                                                                                                                                                                                             | ?                          | ?                      | +                                      | -                              | ?                              | n/a                                      |
| de Jong, Visser, et al.                                                                                                                                                                                                                                                                                                                                                                                                                          | -                          | ?                      | +                                      | ?                              | -                              | n/a                                      |
| Fu, van Ryn, et al.                                                                                                                                                                                                                                                                                                                                                                                                                              | ?                          | ?                      | +                                      | -                              | + <sup>1</sup>                 | n/a                                      |
| Galbreath, Krasuski, et al.                                                                                                                                                                                                                                                                                                                                                                                                                      | ?                          | ?                      | +                                      | +                              | ?                              | n/a                                      |
| Gerber, Prasad, et al.                                                                                                                                                                                                                                                                                                                                                                                                                           | ?                          | -                      | +                                      | ?                              | -                              | n/a                                      |
| Green, Wang, et al.                                                                                                                                                                                                                                                                                                                                                                                                                              | -                          | -                      | +                                      | -                              | -                              | n/a                                      |
| Hoffman, Steel, et al.                                                                                                                                                                                                                                                                                                                                                                                                                           | -                          | ?                      | ?                                      | ?                              | ?                              | n/a                                      |
| Israel, Farley, et al.                                                                                                                                                                                                                                                                                                                                                                                                                           | -                          | ?                      | -                                      | -                              | ?                              | n/a                                      |
| McCarren, Furmaga, et al.                                                                                                                                                                                                                                                                                                                                                                                                                        | -                          | ?                      | +                                      | +                              | -                              | n/a                                      |
| Phillips, Rothstein, et al.                                                                                                                                                                                                                                                                                                                                                                                                                      | ?                          | ?                      | +                                      | ?                              | ?                              | n/a                                      |
| Piazza, Anderson, et al.                                                                                                                                                                                                                                                                                                                                                                                                                         | -                          | -                      | +                                      | ?                              | -                              | n/a                                      |
| Qureshi, Armstrong, et al.                                                                                                                                                                                                                                                                                                                                                                                                                       | -                          | -                      | +                                      | ?                              | -                              | n/a                                      |
| Skinner, Halm, et al.                                                                                                                                                                                                                                                                                                                                                                                                                            | ?                          | ?                      | +                                      | ?                              | -                              | n/a                                      |
| Stewart, Perkins, et al.                                                                                                                                                                                                                                                                                                                                                                                                                         | -                          | -                      | +                                      | -                              | -                              | n/a                                      |
| Vestbo, Leather, et al.                                                                                                                                                                                                                                                                                                                                                                                                                          | -                          | -                      | +                                      | ?                              | +                              | n/a                                      |
| Wolf, Fitzner, et al.                                                                                                                                                                                                                                                                                                                                                                                                                            | ?                          | ?                      | +                                      | ?                              | ?                              | n/a                                      |
| -: Low risk of bias; ?: Unclear risk of bias; +: High risk of bias<br><sup>1</sup> EHR-based outcome data completeness (secondary study outcome) was perfect (0% missing data).<br><sup>2</sup> Since only the publication identified in our literature search was assessed (there was no systematic protocol search and no searching for further manuscripts related to that study), the “selective outcome reporting” item was not considered. |                            |                        |                                        |                                |                                |                                          |
