# Supplementary material
Source: PubMed Central journal article supplement (PMC6375253)
Supplement: supp_7.1.E23_prisma-checklist.pdf [file supp_7.1.E23_prisma-checklist.pdf]

# Guidelines for reporting meta-epidemiological methodology research

Mohammad Hassan Murad and Zhen Wang

**Table 1**

Proposed items to be used for reporting methodology research, adapted from the PRISMA Checklist (<http://prisma-statement.org/PRISMA Statement/Checklist.aspx>)

| Section/topic           | Proposed item to be used in methodology research                                                                                                                                                                                        | Location in the manuscript |
|-------------------------|-----------------------------------------------------------------------------------------------------------------------------------------------------------------------------------------------------------------------------------------|----------------------------|
| <b>Title</b>            |                                                                                                                                                                                                                                         |                            |
| Title                   | Identify the report as a meta-epidemiologic study.                                                                                                                                                                                      | Lines 1-2                  |
| <b>Abstract</b>         |                                                                                                                                                                                                                                         |                            |
| Structured summary      | Provide a structured summary that includes the background of the topic, goal of the study, data sources, method of data selection, appraisal and synthesis methods, results, limitations, conclusions and implications of key findings. | Lines 46-68                |
| <b>Introduction</b>     |                                                                                                                                                                                                                                         |                            |
| Rationale               | Describe the rationale for the meta-epidemiological study in the context of what is already known.                                                                                                                                      | Lines 71-103               |
| Objectives              | Provide an explicit statement of the goal of the meta-epidemiological study and the hypothesis being empirically tested.                                                                                                                | Lines 104-109              |
| <b>Methods</b>          |                                                                                                                                                                                                                                         |                            |
| Protocol                | Indicate if a protocol exists, if and where it can be accessed (eg, Web address). Registration of a protocol is not mandatory.                                                                                                          | Line 124                   |
| Eligibility criteria    | Specify study characteristics used as criteria for eligibility with a rationale.                                                                                                                                                        | Lines 111-115              |
| Information sources     | Describe all information sources (eg, databases with dates of coverage, contact with experts to identify additional studies, Internet searches) and search date.                                                                        | Lines 126-134              |
| Search                  | Present full electronic search strategy for at least one database, including any limits used, such that it could be repeated. Search is commonly not driven by a clinical question.                                                     | Appendix                   |
| Study selection         | Describe the process for selecting studies for inclusion (ie, how many reviewers selected studies, reviewing in duplicate or by single individuals).                                                                                    | Lines 171-186              |
| Data collection process | Describe method of data extraction from reports (eg, piloted forms, independently, in duplicate) and any processes used for manipulating data or obtaining and confirming data from investigators.                                      | Lines 171-186 and 178-180  |
| Data items              | List and define all variables for which data were sought and any assumptions and imputations made.                                                                                                                                      | Lines 188-191              |

|                                    |                                                                                                                                                                                                                                                                                                                                                                                                                                              |                             |
|------------------------------------|----------------------------------------------------------------------------------------------------------------------------------------------------------------------------------------------------------------------------------------------------------------------------------------------------------------------------------------------------------------------------------------------------------------------------------------------|-----------------------------|
| Risk of bias in individual studies | If risk of bias assessment of individual studies was relevant to the analysis, describe the items used and how this information is to be used during data synthesis.                                                                                                                                                                                                                                                                         | 173 – 175<br>Appendix 4     |
| Summary measures                   | State the principal summary measures (eg, ratio of risk ratios, difference in means) and explain its meaning and direction to readers.                                                                                                                                                                                                                                                                                                       | N/A                         |
| Synthesis of results               | Describe the statistical or descriptive methods of synthesis including measures of consistency if relevant. If applicable, describe the development of statistical or simulation modelling based on theoretical background. Describe and justify assumptions and computational approximations. Describe methods of additional analyses (eg, sensitivity or subgroup analyses, meta-regression), if done, indicating which were prespecified. | Lines 193-195               |
| <b>Results</b>                     |                                                                                                                                                                                                                                                                                                                                                                                                                                              |                             |
| Study selection                    | Give numbers of studies assessed for eligibility and included in the study, with reasons for exclusions at each stage, ideally with a flow diagram. Present a measure of inter-reviewer agreement (eg, kappa statistic).                                                                                                                                                                                                                     | Figure 1<br>Lines 198 - 199 |
| Study characteristics              | For each study, present characteristics for which data were extracted and provide the citations. Clinical characteristics may not always be relevant.                                                                                                                                                                                                                                                                                        | Lines 201-262               |
| Risk of bias within studies        | If risk of bias assessment of individual studies was used in the meta-epidemiological analysis, report risk of bias indicators of each study to allow replication of findings.                                                                                                                                                                                                                                                               | Lines 264 - 270             |
| Results of individual studies      | Present data elements used in the meta-epidemiological analysis from each study (results of clinical outcomes may not be relevant).                                                                                                                                                                                                                                                                                                          | N/A                         |
| Synthesis of results               | Present results of statistical analysis done, including measures of precision and measures of consistency. Present validity of assumptions and fit of statistical or simulation modelling, if applicable.                                                                                                                                                                                                                                    | NA                          |
| Additional analysis                | Give results of additional analyses, if done (eg, sensitivity or subgroup analyses, meta-regression).                                                                                                                                                                                                                                                                                                                                        | N/A                         |
| <b>Discussion</b>                  |                                                                                                                                                                                                                                                                                                                                                                                                                                              |                             |
| Summary of evidence                | Summarise the main findings and compare them with existing knowledge about the topic. The quality of evidence may not be relevant; however, investigators should describe their certainty in the results to readers.                                                                                                                                                                                                                         | Lines 281 - 359             |
| Limitations                        | Discuss limitations at research methodology level (eg, likelihood of reporting or publication bias).                                                                                                                                                                                                                                                                                                                                         | Lines 361 - 390             |
| Conclusions                        | Provide general interpretation of the results and implications for future research. Provide any plausible impact on clinical practice.                                                                                                                                                                                                                                                                                                       | Lines 392 - 397             |
| <b>Funding</b>                     |                                                                                                                                                                                                                                                                                                                                                                                                                                              |                             |

|         |                                                                               |                 |
|---------|-------------------------------------------------------------------------------|-----------------|
| Funding | Describe sources of funding for the methodology research and role of funders. | Lines 419 - 420 |
|---------|-------------------------------------------------------------------------------|-----------------|
